# Supplementary material
Source: PubMed Central journal article supplement (PMC4374163)
Supplement: NIHMS61867-supplement-1.pdf [file NIHMS61867-supplement-1.pdf]

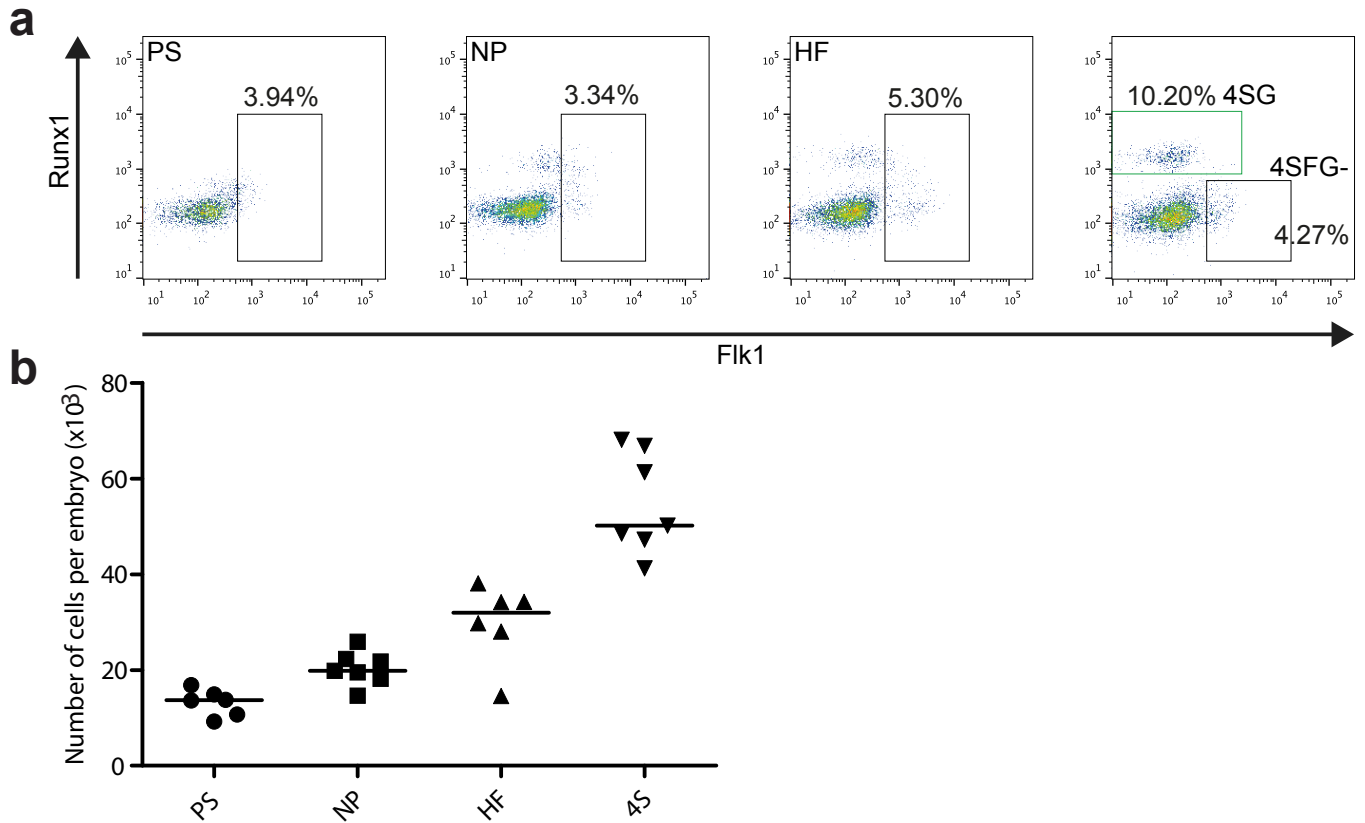

**Supplementary Figure 1:** Fluorescence activated cell sorting of cells with blood potential. **(a)** Gating strategy for Fik1<sup>+</sup> cells at PS, NP and HF stages, and Runx1-ires-GFP<sup>+</sup> cells (4SG) or Fik1<sup>+</sup>Runx1-ires-GFP<sup>-</sup> cells (4SFG<sup>-</sup>) at the 4S stage. **(b)** Total numbers of cells per embryo at each stage, estimated from FACS data. Each point represents one embryo and lines indicate the median.

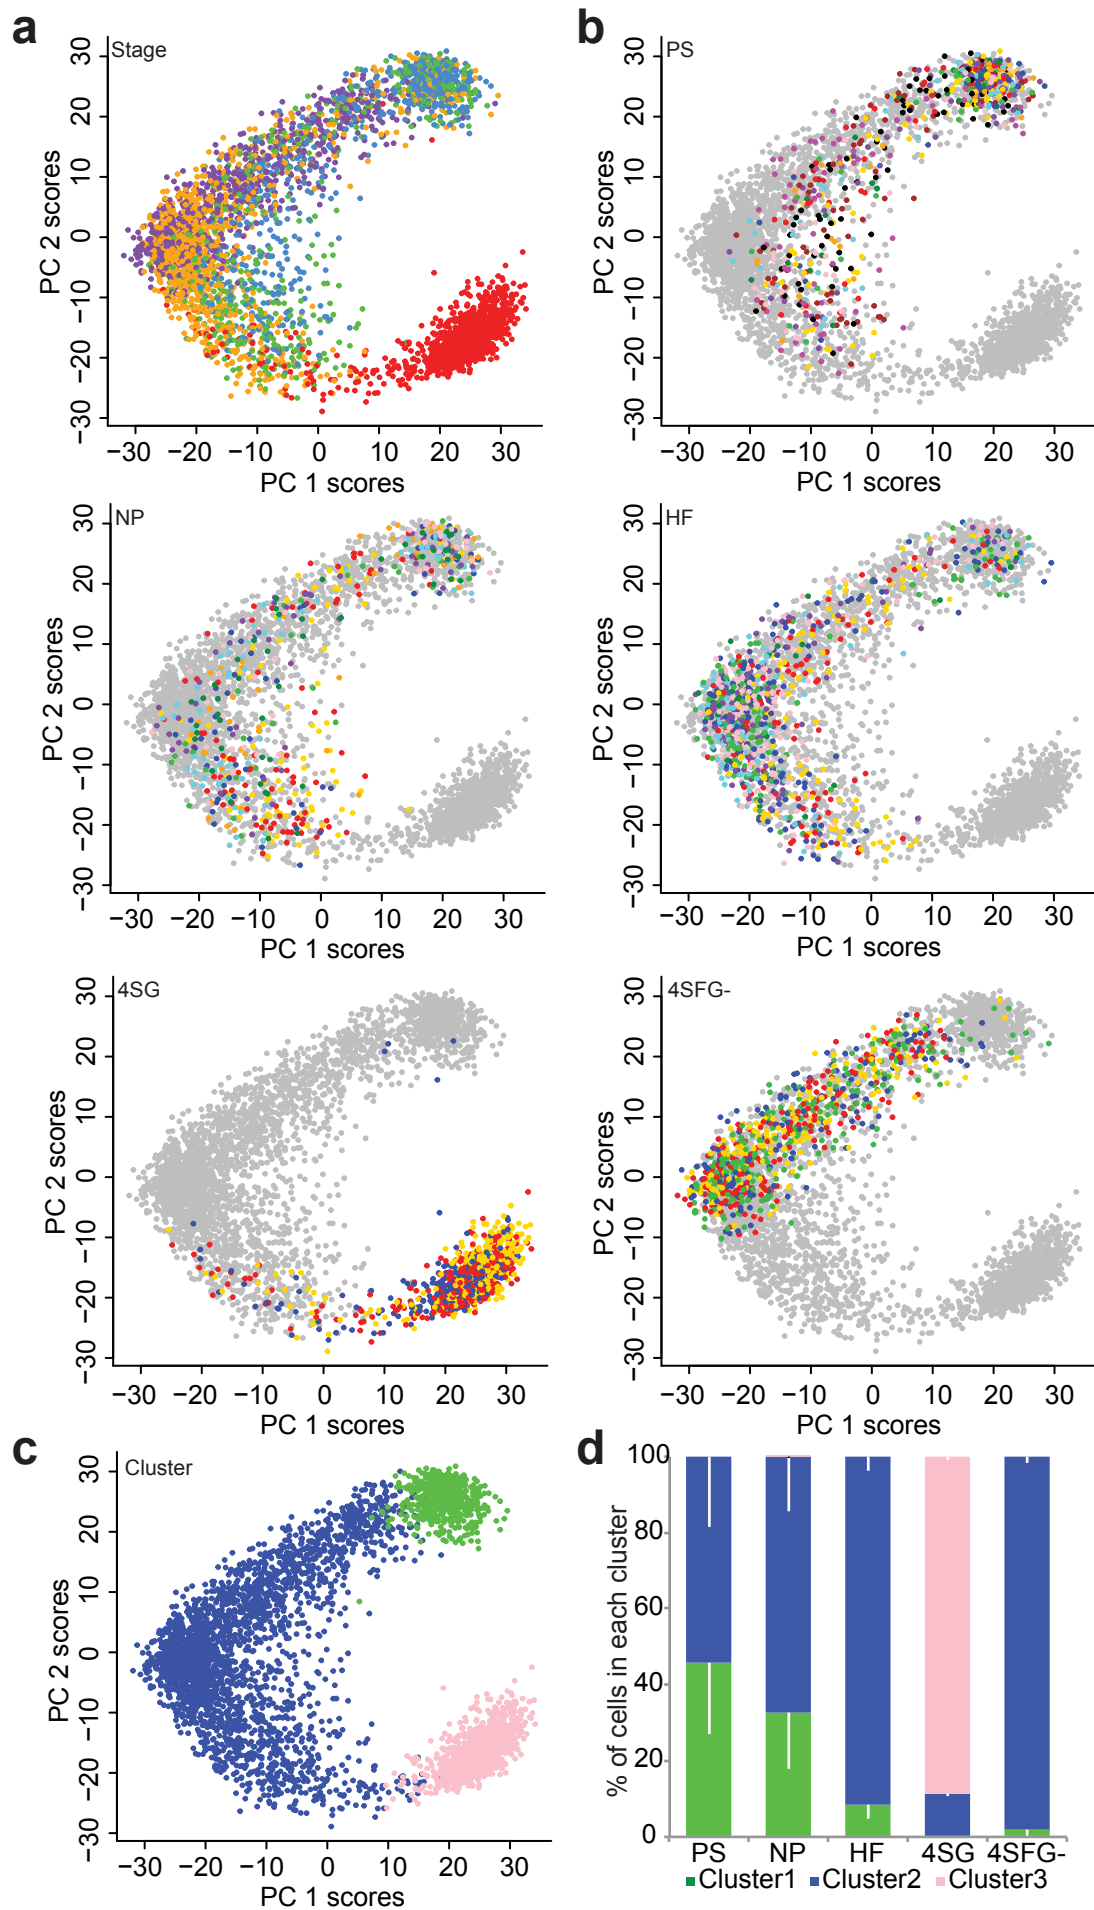

**Supplementary Figure 2: Development is asynchronous. (a)** PCA of the 3,934 cells, coloured retrospectively according to the stage from which they were sorted. Blue, PS; green, NP; orange, HF; red, 4SG; purple, 4SFG-. **(b)** For each stage, the cells from different embryos are shown on the PCA as different colours (cells from other stages shown in grey). **(c)** PCA coloured according to the clusters cells belong to in Figure 1e. Green, I; Blue, II; Pink, III. **(d)** For each embryo, the percentage of cells in clusters I, II and III was calculated. The mean and standard deviation was then calculated for each cluster in each stage. Number of embryos shown in Fig. 1C.

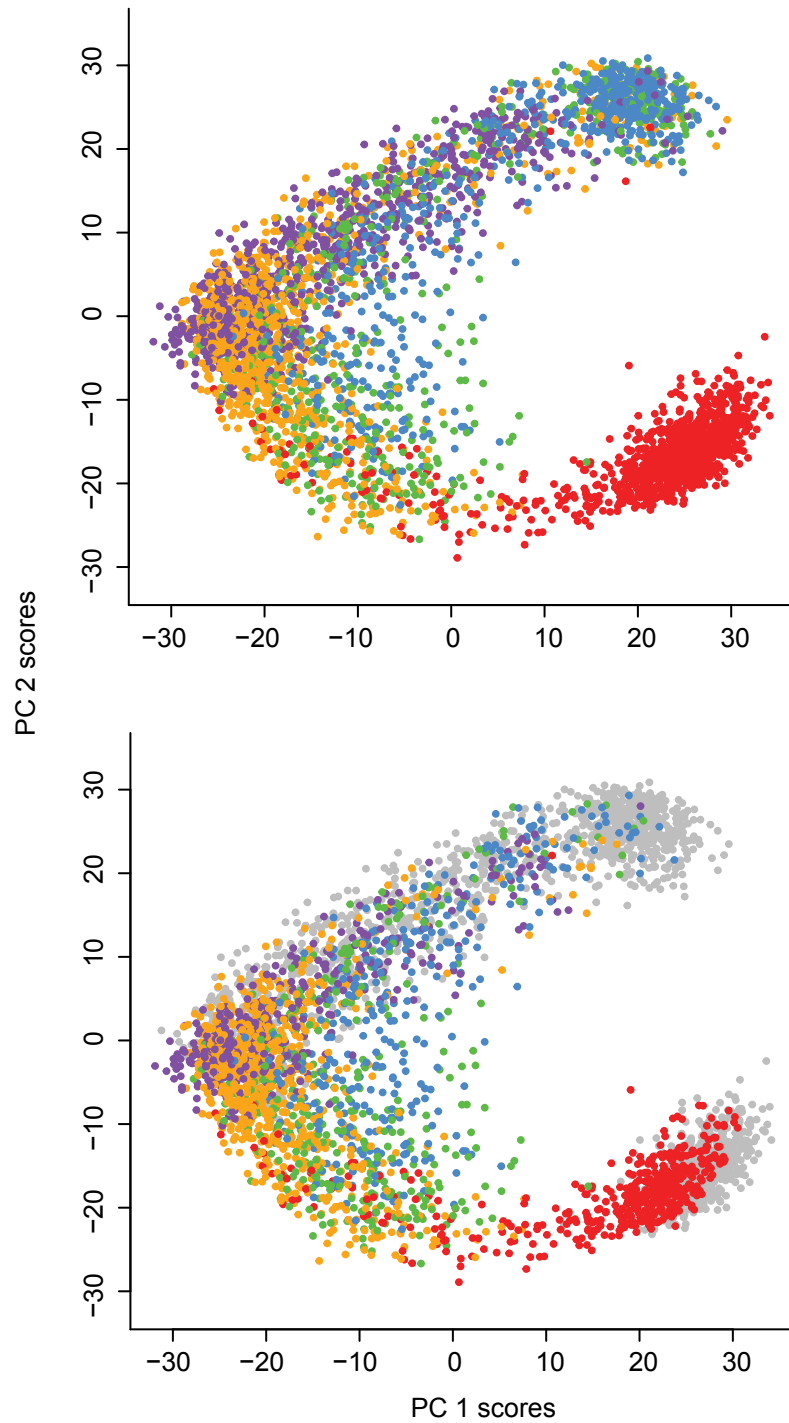

**Supplementary Figure 3:** Flk1<sup>+</sup>Runx1<sup>+</sup> cells are found in all anatomical stages. Principal component analysis coloured according to stage of sorting (top) and whether cells express both Flk1 and Runx1 at the gene expression level (bottom). Cells not expressing both genes shown in grey. Blue, PS; green, NP; orange, HF; red, 4SG; purple, 4SFG.

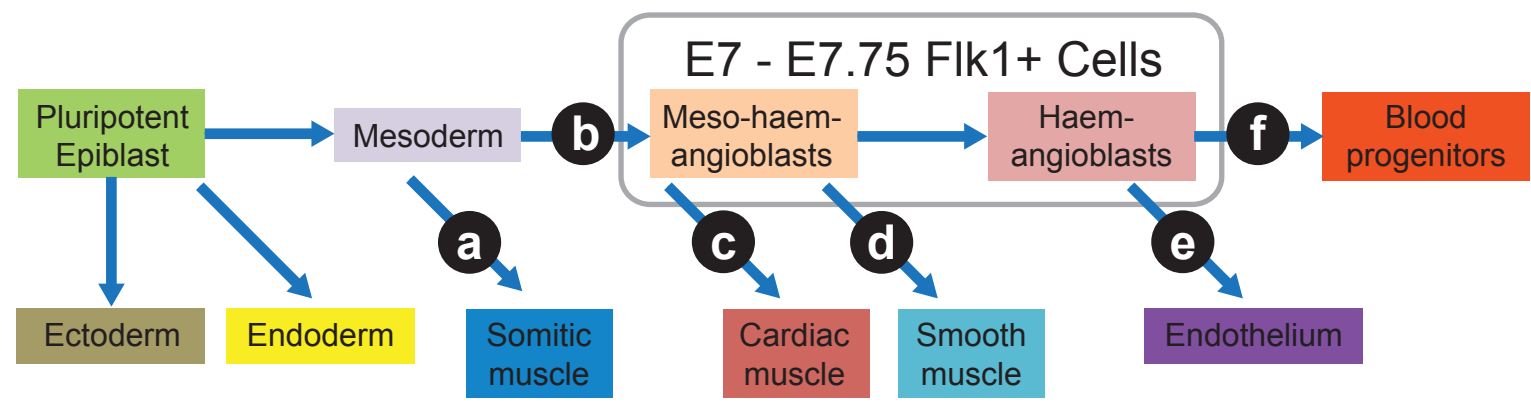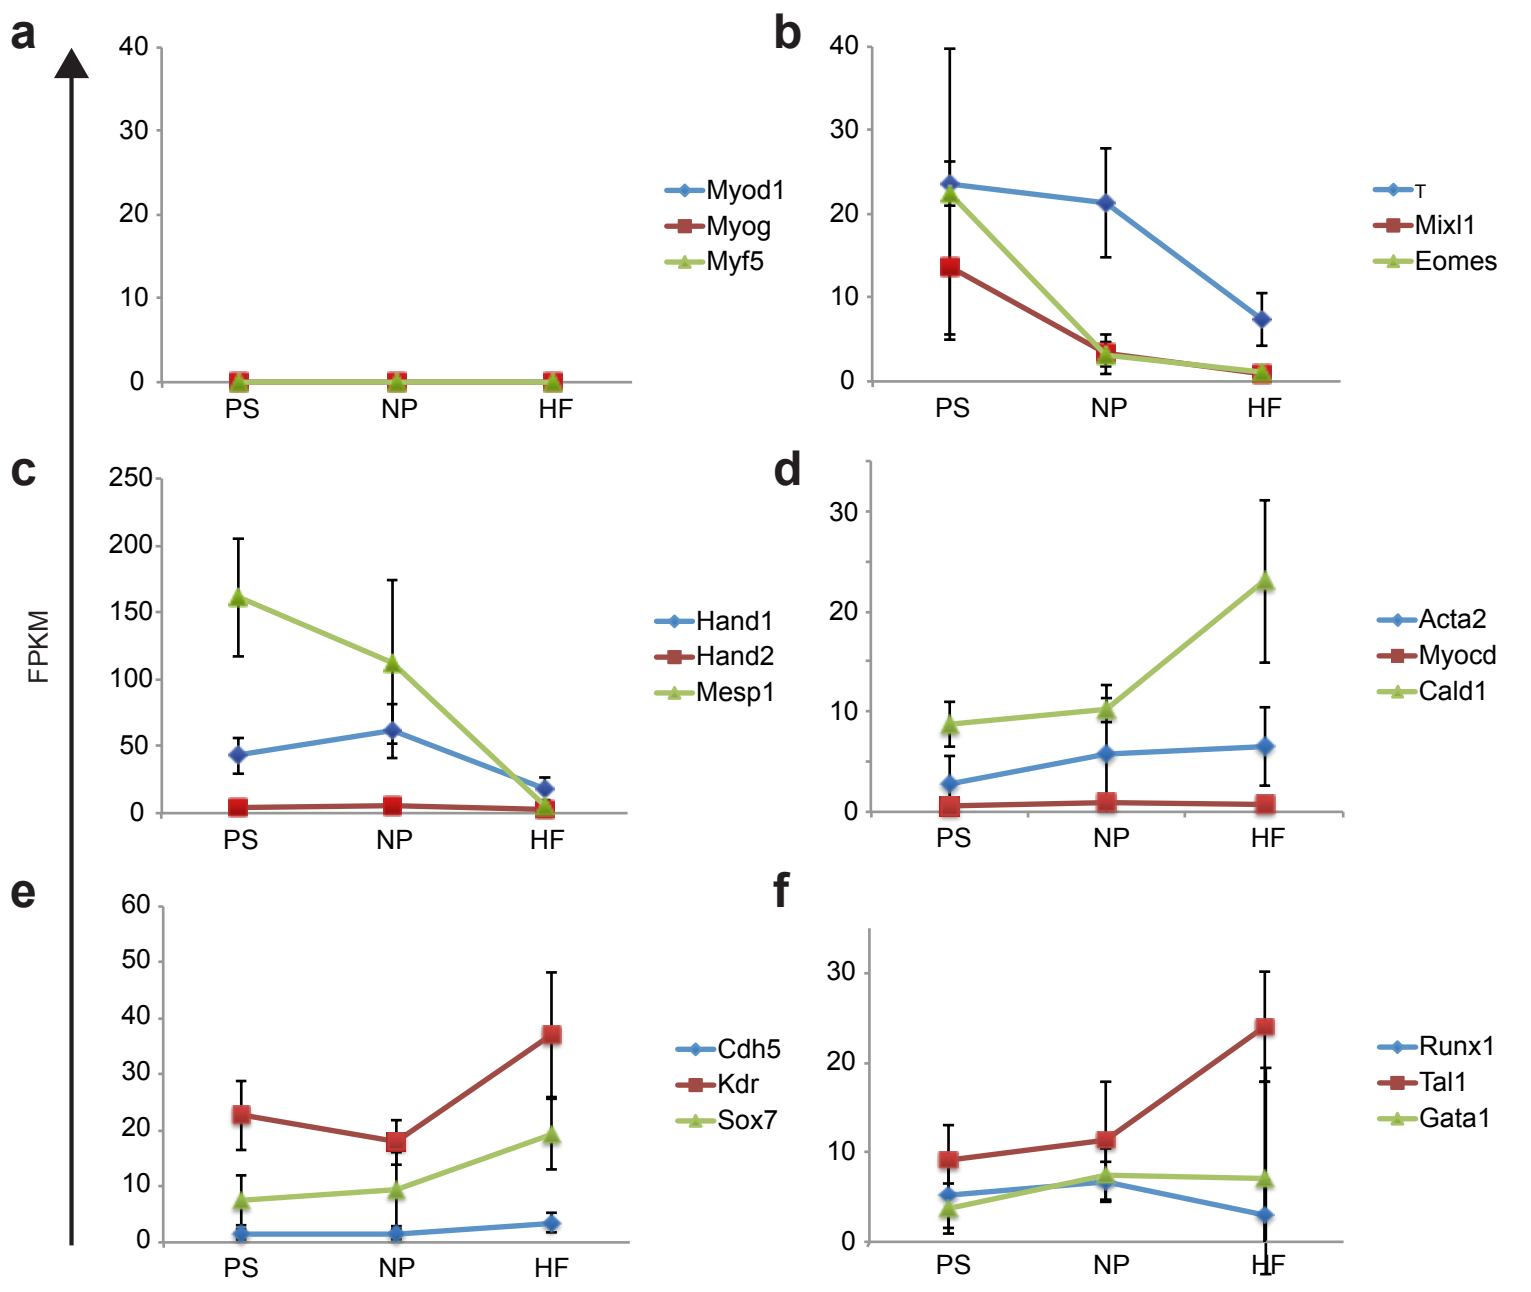

**Supplementary Figure 4:** RNA sequencing of populations of 50 cells. Schematic of early embryonic development of the mesodermal lineage. The cardiac, smooth muscle, endothelial and blood lineages all diverge from FIK1<sup>+</sup> mesoderm, while somatic muscle diverges earlier. **(a-f)** Populations of 50 cells were sorted from 5 embryos each at PS, NP and HF stages. FPKM values for three key genes are shown for each of the lineage decisions in the schematic. Points are the mean and s.d. of the 5 replicates.



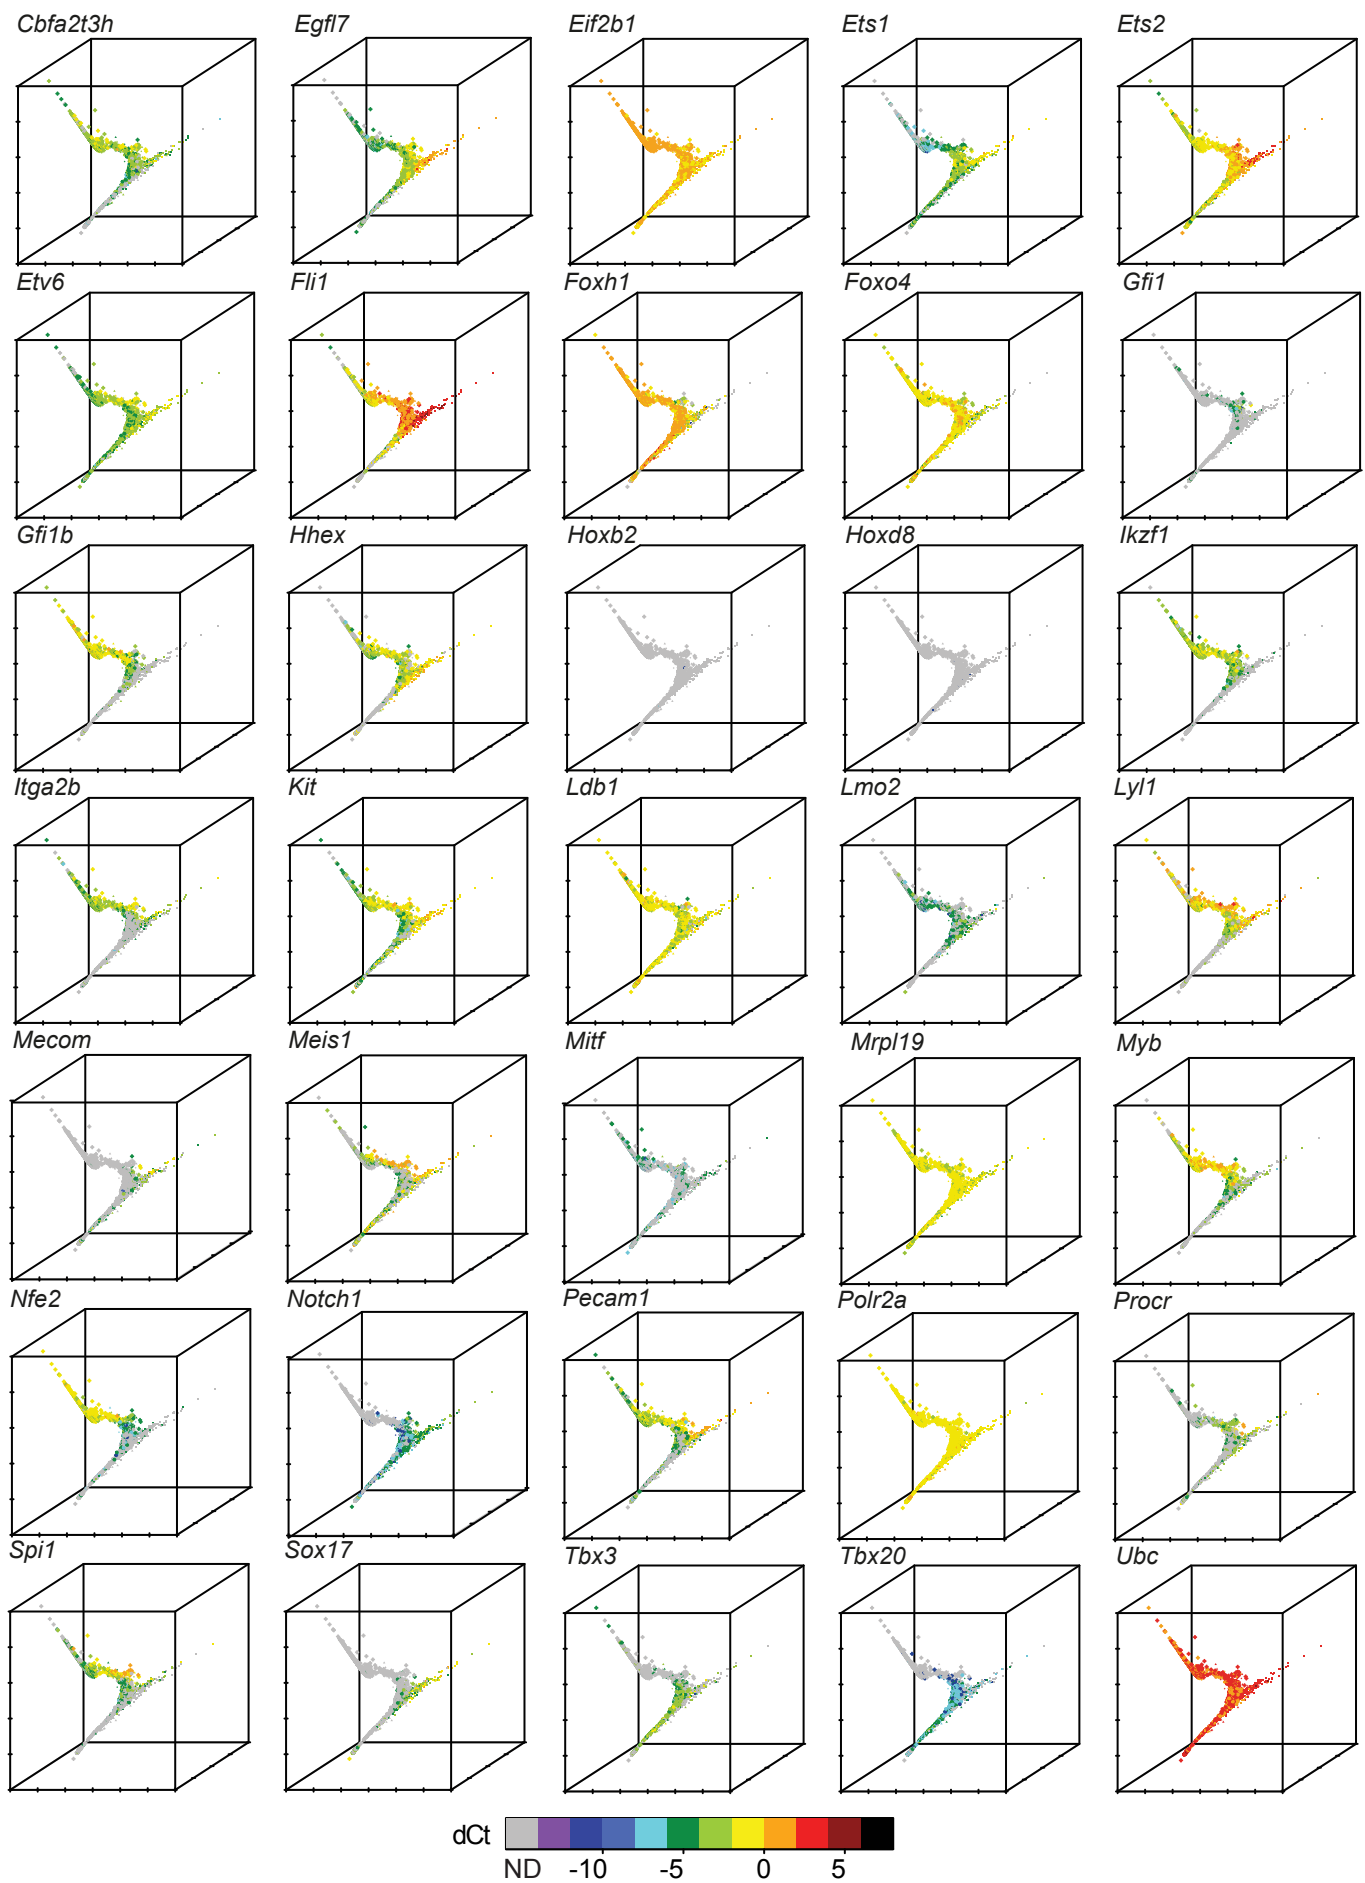

**Supplementary Figure 5: Diffusion plots.** Diffusion plots showing expression patterns of additional genes not shown in Figure 2.

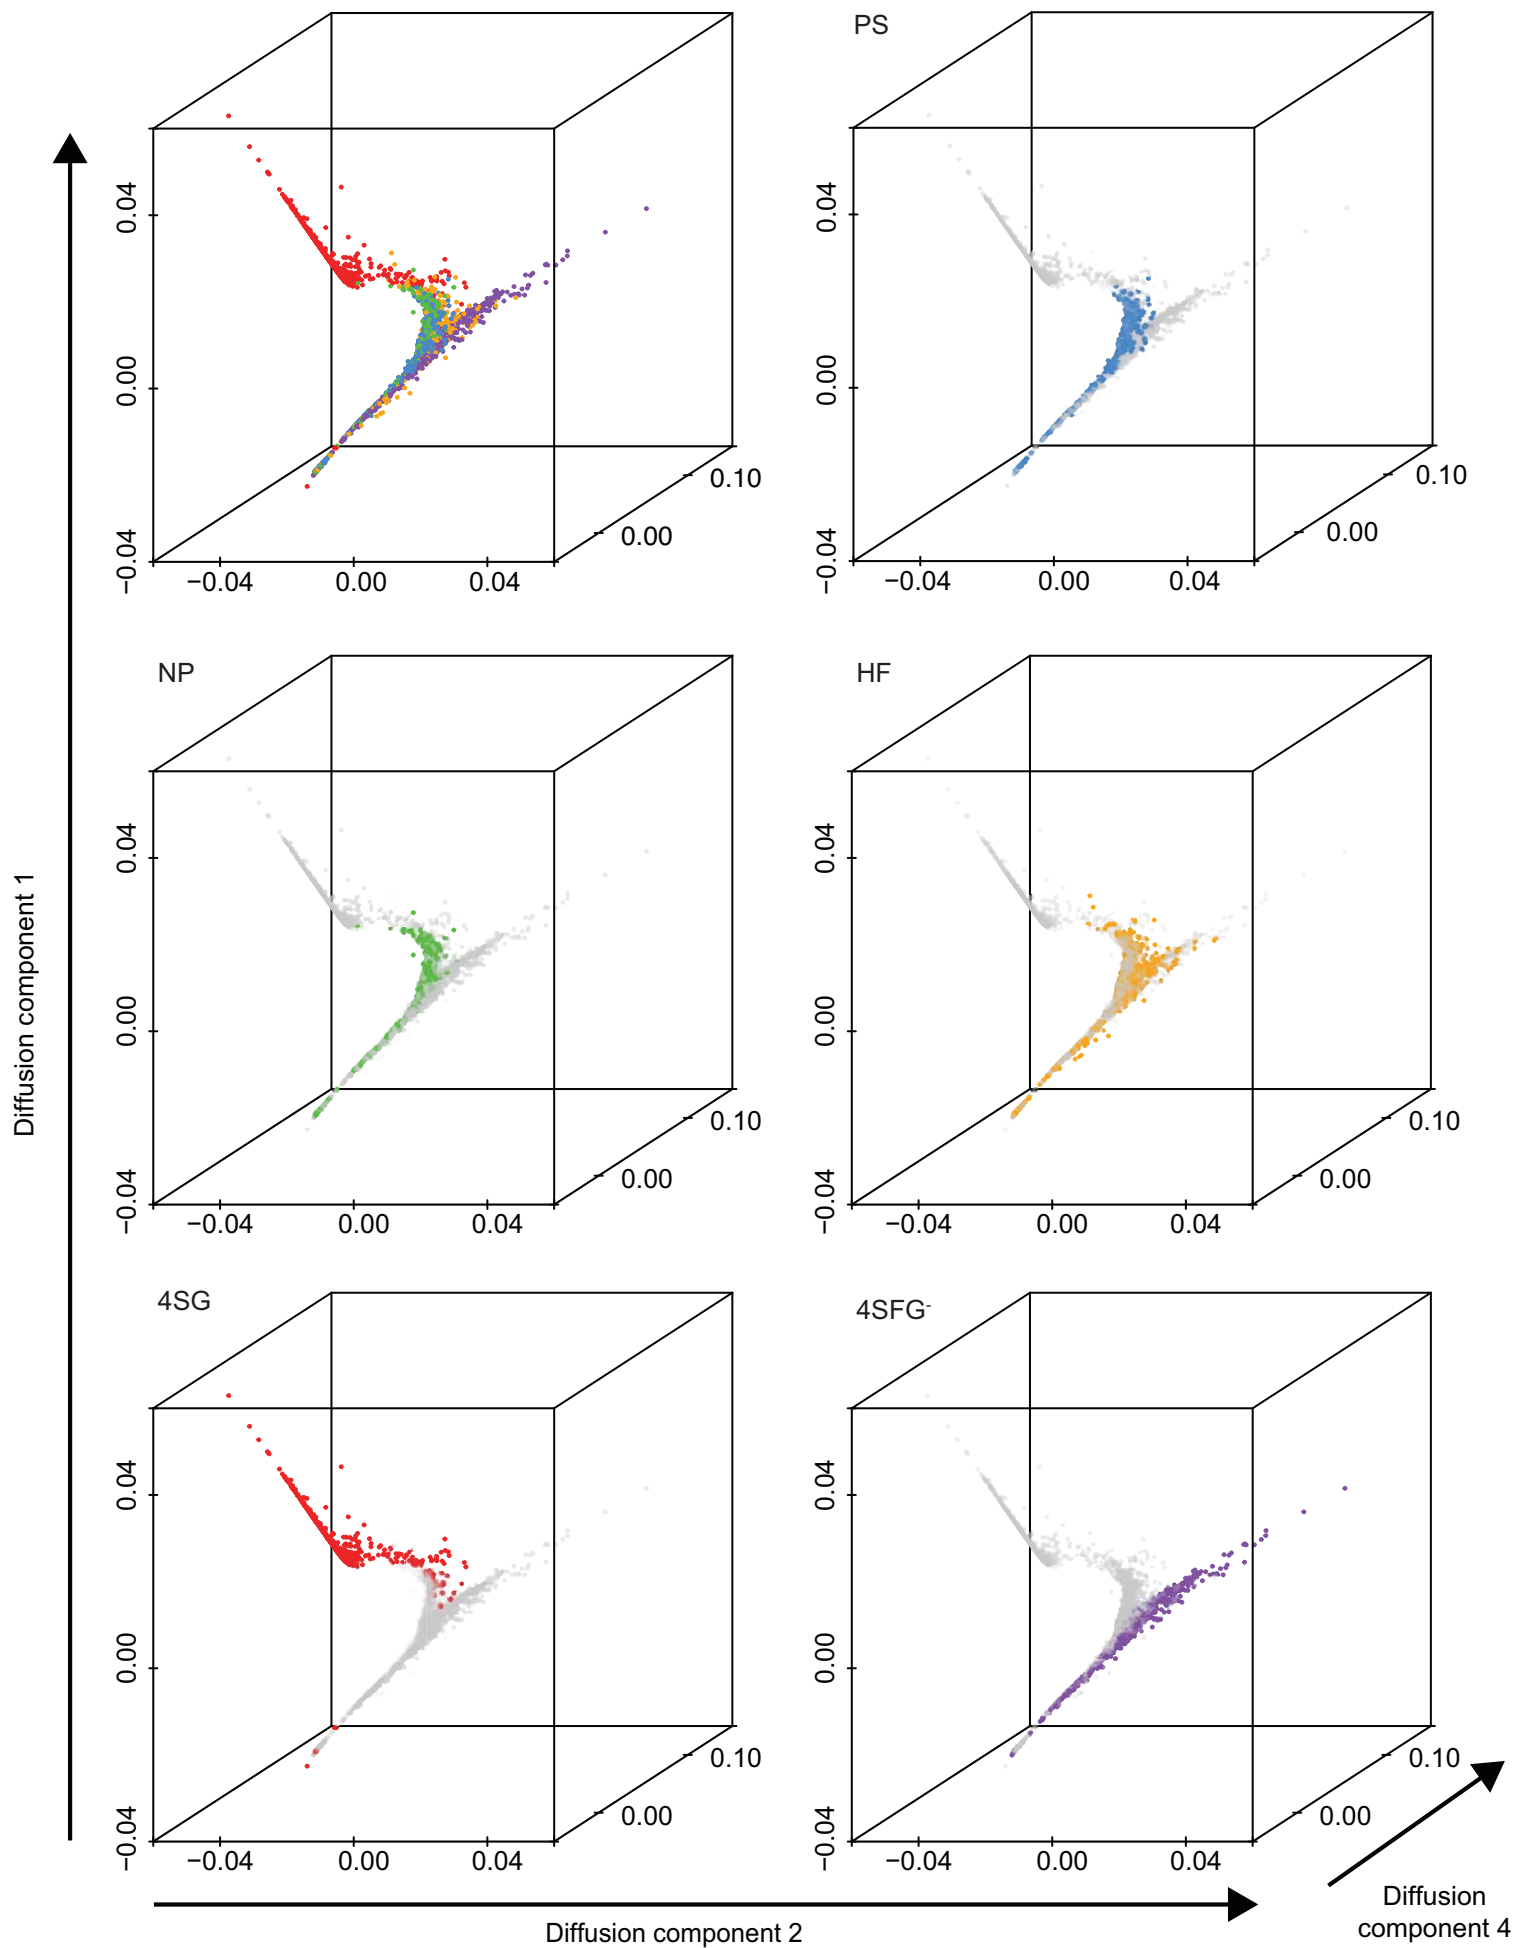

**Supplementary Figure 6:** Diffusion plots highlighting each stage. Top left plot shows all populations, other plots were coloured according to embryonic stage with cells from other stages shown in grey. Blue, PS; green, NP; orange, HF; red, 4SG; purple, 4SFG<sup>-</sup>.

Diffusion map

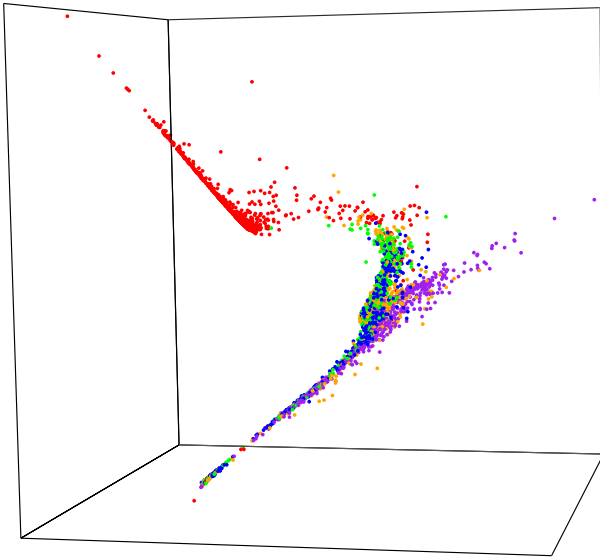

PCA

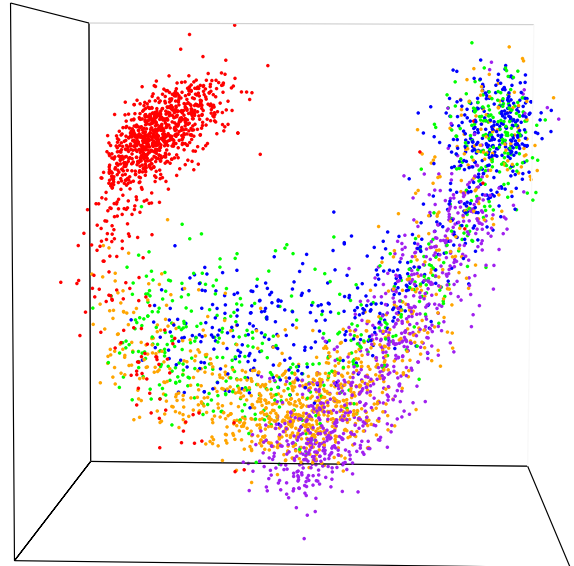

ICA

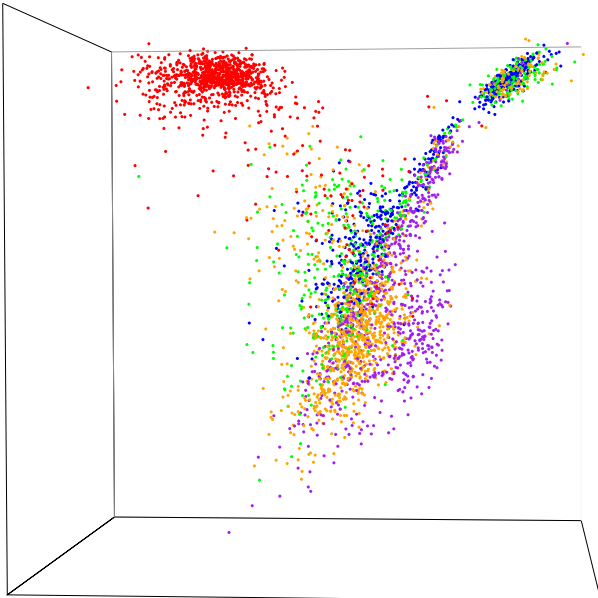

tSNE

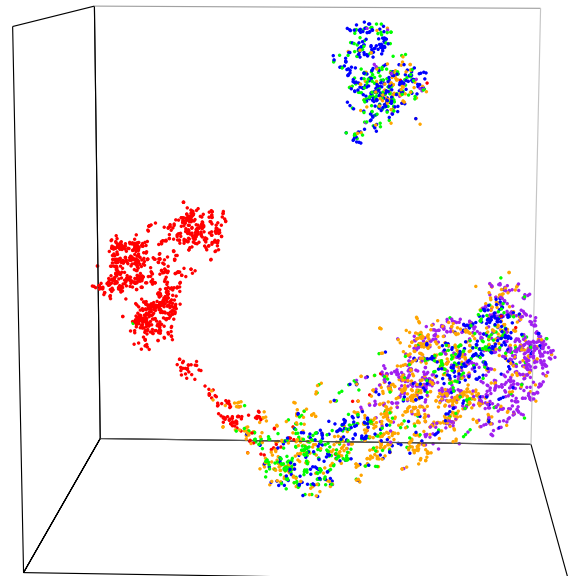

**Supplementary Figure 7:** Comparison of multivariate analysis techniques. The data for all 3,934 cells were plotted using diffusion maps, principal component analysis, independent component analysis and t-SNE. Blue, PS; green, NP; orange, HF; red, 4SG; purple, 4SFG.

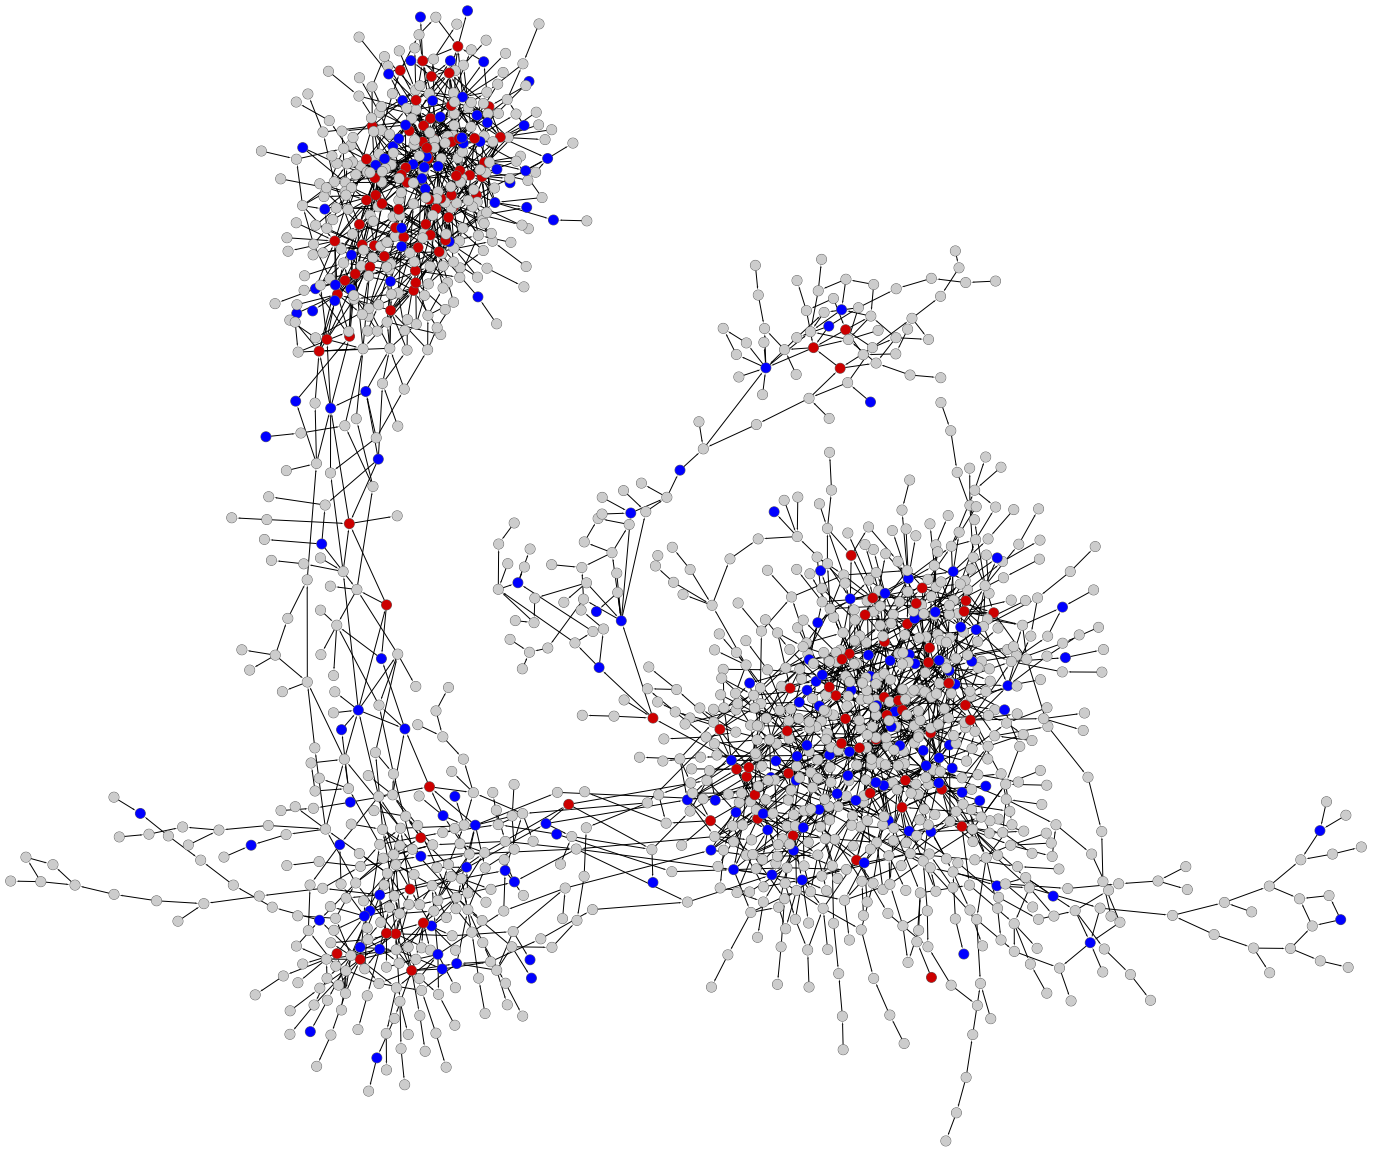

**Supplementary Figure 8:** Some states occur in multiple cells. State transition graph coloured by the number of times each binary state occurs in the 3,934 expression profiles. Grey, occurs once; blue, occurs twice; red, occurs more than twice.

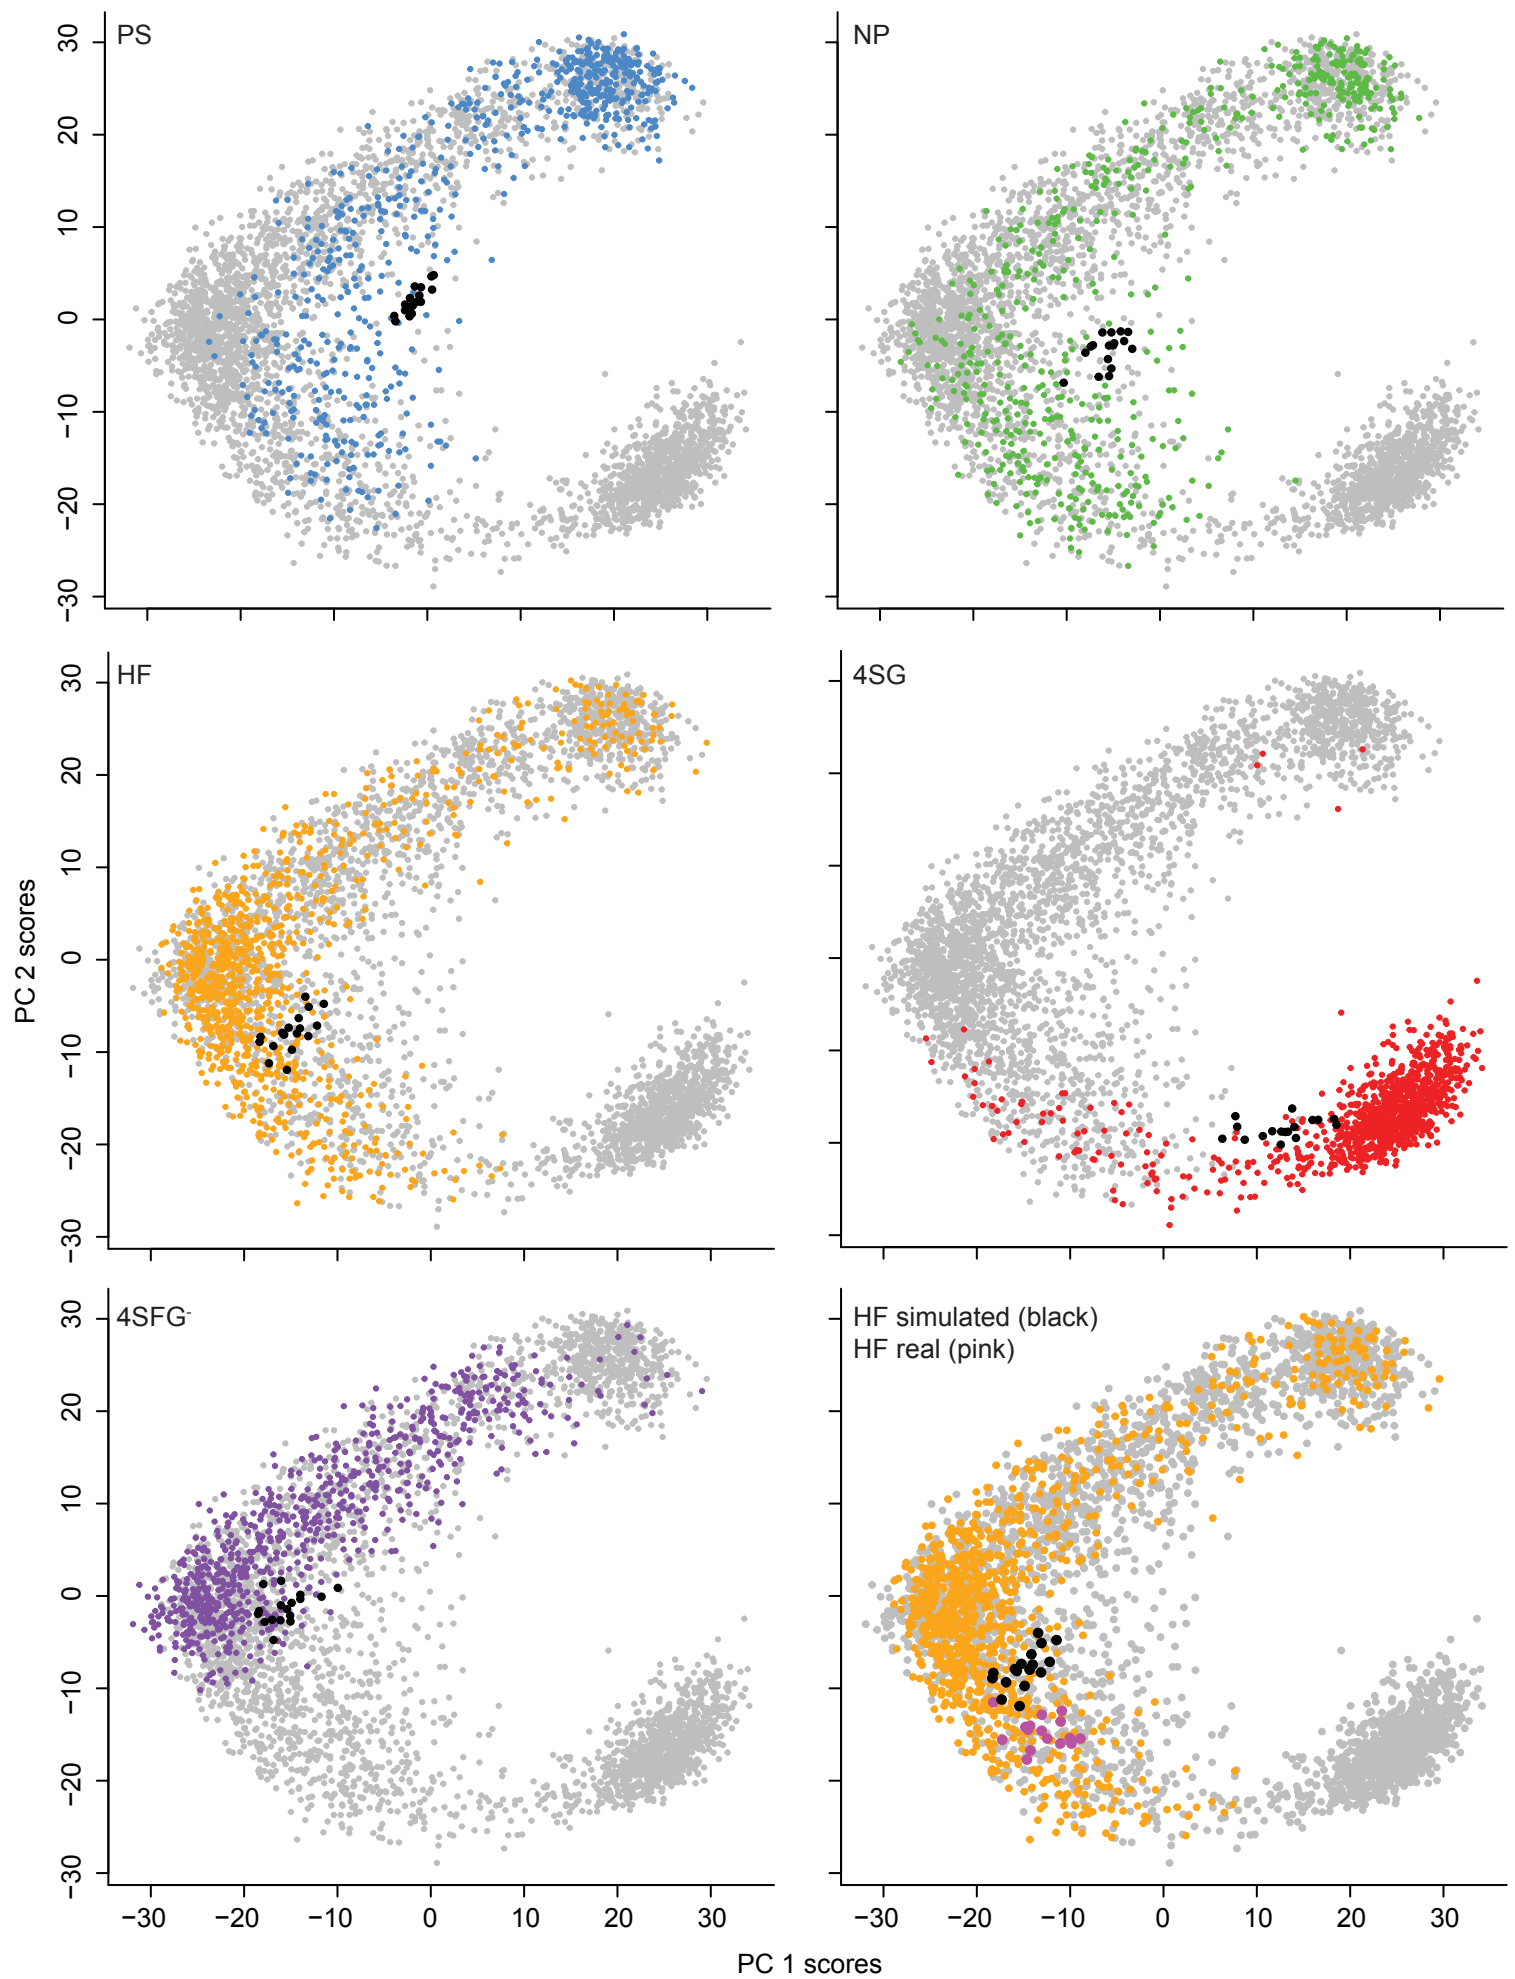

**Supplementary Figure 9:** Populations mask variation and asynchrony. Pools of 20 cells were simulated from single cell data and projected onto the principal component analysis for all 3,934 cells. Each plot shows one embryonic stage and the simulated pools of 20 cells for that population in black (normalized in the same way as single cells). Bottom right hand plot shows the head fold stage and simulated pools as well as actual pools of 20 cells sorted from embryos (pink).

**a**

| Factor type | TFs                         | Motif    |
|-------------|-----------------------------|----------|
| AP1-like    | Nfe2                        | TCAY     |
| Ets         | Erg, Ets1, Etv2, Fli1, PU.1 | GGAW     |
| Ebox        | Scl, Lyl1                   | CANNTG   |
| Gata        | Gata1                       | GATA     |
| Gfi         | Gfi1, Gfi1b                 | AATC     |
| HMG box     | Sox7, Sox17                 | WWCAAAG  |
| Homeobox    | Hhex                        | YWATTAAR |
| Homeobbox   | Hoxb4                       | TAAT     |
| Ikaros      | Ikaros                      | HRGGAW   |
| Myb         | Myb                         | YAACNG   |
| Rbpj        | Notch1                      | TTCCCAA  |

**Supplementary Figure 10:** Analysis of transcription factor binding sites in network gene loci. **(a)** Motifs for DNA-binding TFs in the core network. Note that Eto2 and Lmo2 do not bind directly to the DNA, and the binding site of the Notch partner Rbpj was used for Notch1 as described previously<sup>1</sup>. **(b)** To search for evidence that predicted regulatory interactions are direct, all haematopoietic TF ChIP-seq data in Codex<sup>2</sup> were searched for peaks within the gene body or 50 kb up- and down-stream of the 20 network genes. Overlapping peaks were merged to identify putative regulatory sequences. Different colours indicate peaks from different experiments. A transcription factor binding site search (TFBS) was performed using TFBSsearch<sup>3</sup> on the mouse genomic sequence of all regions to identify the consensus binding sites of the network TFs. Evolutionary conservation of TF binding motifs is a well-recognised feature of truly functional binding sites<sup>4</sup>. To identify conserved binding sites, PhyloP scores were calculated for each motif across 60 species using the tool provided by the UCSC Genome Browser. Evolutionarily conserved motifs previously validated in functional assays by us and other were characterised by PhyloP scores greater than 1, which was therefore used as the threshold. Results are summarised in Supplementary Table 2.

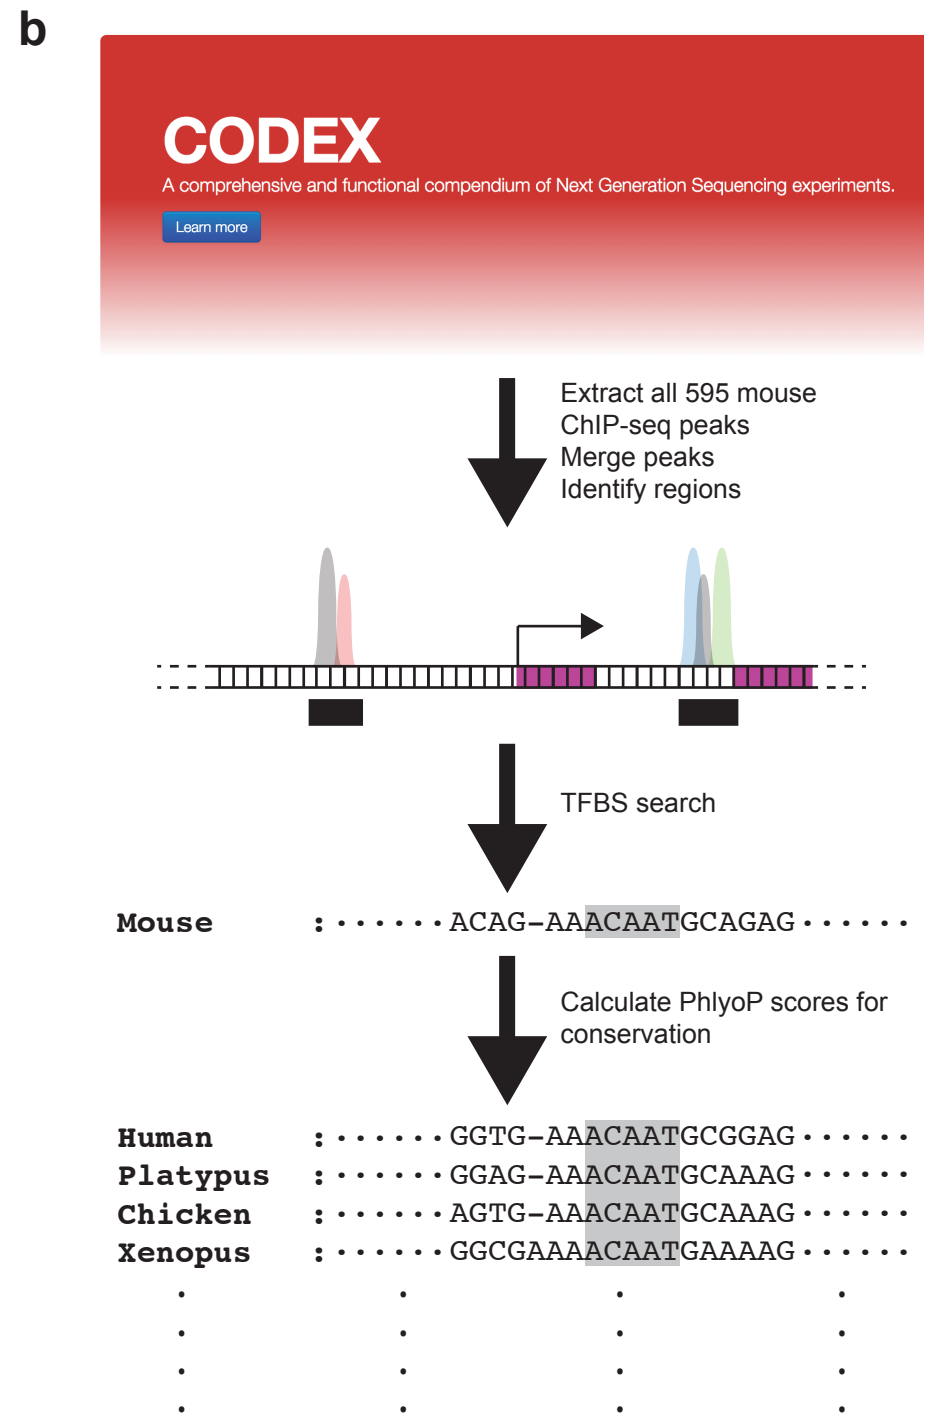



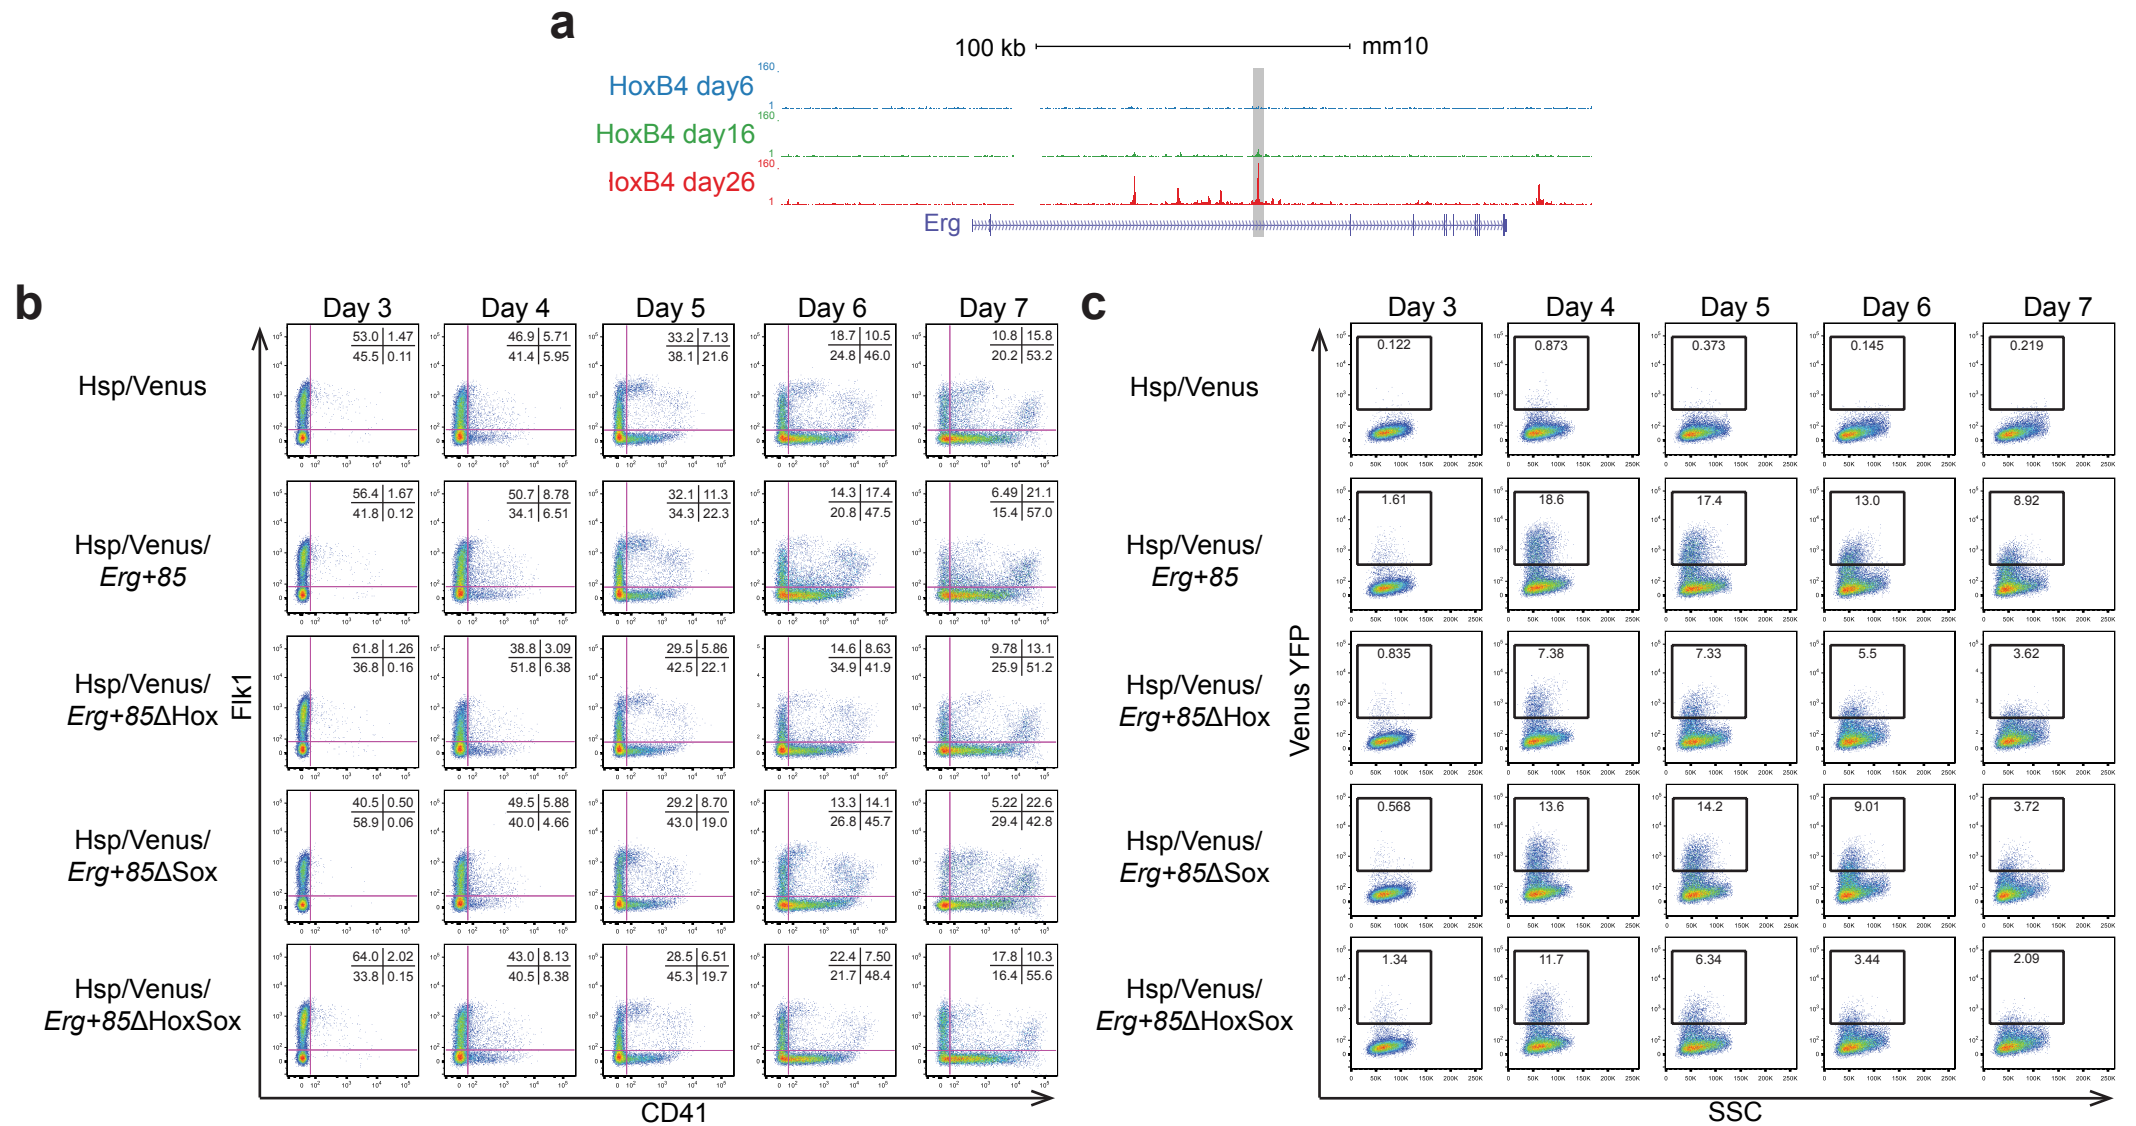

**Supplementary Figure 11:** The *Erg+85* enhancer is active during haematopoietic development. **(a)** UCSC Genome Browser tracks of re-analysed ChIP-Seq data for HoxB4<sup>5</sup> indicate that HoxB4 binds to the *Erg+85* enhancer (shown in grey) during a 26-day differentiation time course that produces HSCs from ES cells, with HSCs able to contribute to long-term engraftment in recipient mice. Binding is absent at day 6, but becomes apparent by day 16. **(b)** Flow cytometric analysis of Fik1 and CD41 expression across a time-course of EB differentiation from Figure 4B indicates that different clones have similar kinetics of differentiation, with Fik1<sup>+</sup> cells giving rise to Fik1<sup>+</sup>CD41<sup>+</sup> and then Fik1<sup>-</sup>CD41<sup>+</sup> cells. **(c)** Flow cytometric analysis of YFP expression in all live cells across a time-course of EB differentiation from Figure 4b illustrates reduction of YFP positive cells in ES cell clones where YFP expression is driven by mutant enhancer constructs. In **(b)** and **(c)**, a representative experiment is shown from three biological repeats of 2-3 clones per construct.



**a**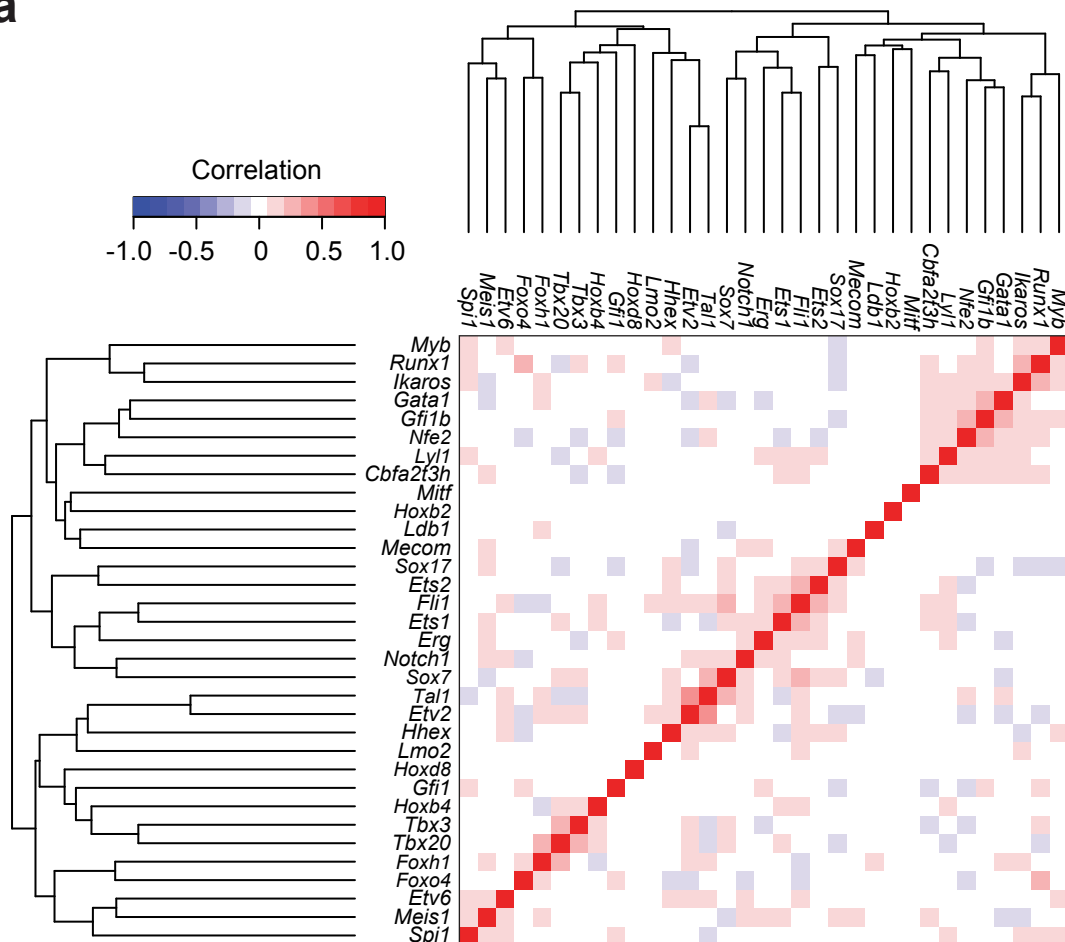**b**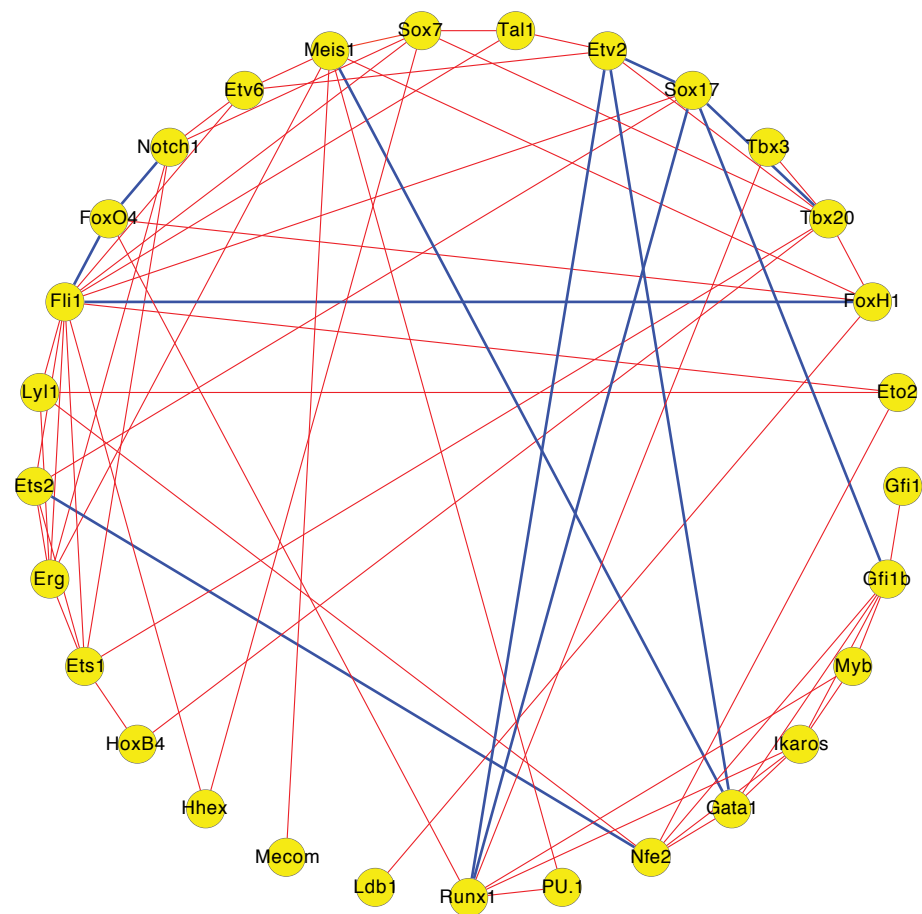

**Supplementary Figure 12: Partial correlation analysis. (a)** Hierarchical clustering of partial correlation coefficients between pairs of transcription factors for all 3,934 expression profiles. Pairwise coefficients were calculated while controlling for the effect of all other transcription factors. *Erg* does not correlate with Sox or Hox factors. **(b)** Network diagram showing putative undirected activating (red) and inhibiting (blue) relationships suggested by significant correlations ( $p$ -value  $< 1e-10$ ).

**Supplementary Table 1:** List of TaqMan assays used for single cell gene expression analysis.

| <b>Gene name</b> | <b>Protein name</b> | <b>Assay ID</b>        |
|------------------|---------------------|------------------------|
| Cbfa2t3h         | Eto2                | Mm00486780_m1          |
| Cdh1             | E-cadherin          | Mm01247357_m1          |
| Cdh5             | VE-cadherin         | Mm00486938_m1          |
| Egfl7            | Egfl7               | Mm00618004_m1          |
| Eif2b1           | Eif2b1              | Mm01199614_m1          |
| Erg              | Erg                 | Mm01214246_m1          |
| Ets1             | Ets1                | Mm01175819_m1          |
| Ets2             | Ets2                | Mm00468977_m1          |
| Etv2             | Etv2                | Mm00468389_m1          |
| Etv6             | Tel                 | Mm01261325_m1          |
| Fli1             | Fli1                | Mm00484409_m1          |
| FoxH1            | FoxH1               | AJD1TLL (custom assay) |
| FoxO4            | FoxO4               | AJLJIMX (custom assay) |
| Gata1            | Gata1               | Mm00484678_m1          |
| Gata2            | Gata2               | Mm00492300_m1          |
| Gfi1             | Gfi1                | Mm00515855_m1          |
| Gfi1b            | Gfi1b               | Mm00492318_m1          |
| Hbb-bH1          | Hbb-bH1             | Mm00756487_mH          |
| Hhex             | Hhex                | Mm00433954_m1          |
| HoxB2            | HoxB2               | Mm04209931_m1          |
| HoxB3            | HoxB3               | Mm00650701_m1          |
| HoxB4            | HoxB4               | Mm00657964_m1          |
| HoxD8            | HoxD8               | AJFARRT (custom assay) |
| Ikzf1            | Ikaros              | Mm01187882_m1          |
| Itga2b           | CD41                | Mm00439768_m1          |
| Kdr              | Flk1                | Mm01222421_m1          |
| Kit              | c-Kit               | Mm00445212_m1          |
| Ldb1             | Ldb1                | Mm00440156_m1          |
| Lmo2             | Lmo2                | Mm01281680_m1          |
| Lyl1             | Lyl1                | Mm01247198_m1          |
| Mecom            | MDS1/Evi1           | Mm01289155_m1          |
| Meis1            | Meis1               | Mm00487659_m1          |
| Mitf             | Mitf                | Mm01182480_m1          |
| Mrpl19           | Mrpl19              | Mm03048937_m1          |
| Myb              | Myb                 | Mm00501741_m1          |
| Nfe2             | Nfe2                | Mm00801891_m1          |
| Notch1           | Notch1              | Mm00435249_m1          |
| Pecam1           | CD31                | Mm01242584_m1          |
| Polr2a           | Polr2a              | Mm00839493_m1          |
| Procr            | Epcr                | Mm00440993_mH          |
| Runx1            | Runx1               | Mm01213405_m1          |
| Spi1             | PU.1                | Mm00488142_m1          |
| Sox17            | Sox17               | Mm04208182_m1          |
| Sox7             | Sox7                | Mm00776876_m1          |
| Tal1             | Scl                 | Mm01187033_m1          |
| Tbx20            | Tbx20               | Mm00451517_m1          |
| Tbx3             | Tbx3                | Mm01195726_m1          |
| Ubc              | Ubc                 | Mm01201237_m1          |

**Supplementary Table 2:** Boolean update rules for the network in Figure 3c, synthesized from the state graph in Figure 3b. The final column indicates whether the DNA binding motifs of the predicted regulators are present in the locus of the target gene (see Supplementary Figure 10).

| Gene   | Synthesised update functions           | % Non-observed transitions disallowed ( $N_i$ ) | Motifs present      |
|--------|----------------------------------------|-------------------------------------------------|---------------------|
| Scl    | <i>Fli1</i>                            | 98                                              | Yes                 |
| Etv2   | <i>Notch1</i>                          | 96                                              | Yes                 |
| Fli1   | <i>Etv2</i>                            | 96                                              | Yes                 |
|        | <i>Sox7</i>                            | 97                                              | Yes                 |
| Lyl1   | <i>Sox7</i>                            | 92                                              | Yes                 |
| Sox7   | $Sox17 \vee HoxB4$                     | 82                                              | No (Sox missing)    |
| Erg    | $(HoxB4 \wedge Lyl1) \vee Sox17$       | 84                                              | Yes                 |
|        | $(HoxB4 \wedge Tal1) \vee Sox17$       | 83                                              | Yes                 |
| Notch1 | <i>Sox7</i>                            | 94                                              | Yes                 |
| Gata1  | $Gfi1b \wedge Lmo2$                    | 86                                              | Yes                 |
|        | $Gfi1b \wedge Hhex$                    | 84                                              | No (Hhex missing)   |
|        | $Gfi1b \wedge Ets1$                    | 84                                              | Yes                 |
| HoxB4  | $(Lyl1 \wedge Ets1) \wedge \neg Gata1$ | 65                                              | Yes                 |
|        | $(Lyl1 \vee Nfe2) \wedge \neg Gata1$   | 65                                              | Yes                 |
|        | $(Lyl1 \vee Ikaros) \wedge \neg Gata1$ | 65                                              | No (Ikaros missing) |
| Sox17  | $Lyl1 \wedge \neg Gfi1b$               | 77                                              | No (Gfi missing)    |
|        | $(Eto2 \wedge Sox7) \wedge \neg Gfi1b$ | 76                                              | No (Gfi missing)    |
|        | $(Eto2 \wedge Tal1) \wedge \neg Gfi1b$ | 75                                              | No (Gfi missing)    |
| Ets1   | <i>Notch1</i>                          | 96                                              | Yes                 |
| Gfi1   | $Gata1 \wedge \neg Sox17$              | 88                                              | Yes                 |
|        | $Nfe2 \wedge \neg Sox17$               | 88                                              | Yes                 |
| Gfi1b  | $Nfe2 \wedge Myb$                      | 87                                              | Yes                 |
|        | $Pu.1 \wedge Ikaros$                   | 86                                              | No (Ikaros missing) |
|        | $Pu.1 \wedge Nfe2$                     | 86                                              | Yes                 |
|        | $Pu.1 \wedge Myb$                      | 86                                              | Yes                 |
| Eto2   | <i>Sox7</i>                            | 93                                              | No (Sox missing)    |
|        | <i>Hhex</i>                            | 92                                              | No (Hhex missing)   |
|        | $Ets1 \wedge Fli1$                     | 94                                              | No (Ets missing)    |
| Hhex   | <i>Sox7</i>                            | 97                                              | No (Sox missing)    |
|        | <i>Notch1</i>                          | 93                                              | No (Rbpj missing)   |
| Ikaros | $Nfe2 \vee Gfi1b$                      | 84                                              | Yes                 |
|        | $Nfe2 \vee Gata1$                      | 83                                              | Yes                 |
|        | $Nfe2 \vee Gfi1$                       | 82                                              | Yes                 |
| Lmo2   | $Sox7 \vee Gfi1$                       | 79                                              | Yes                 |
|        | $Sox7 \vee Erg$                        | 79                                              | Yes                 |
|        | $Sox7 \vee HoxB4$                      | 77                                              | Yes                 |
| Nfe2   | <i>Ikaros</i>                          | 78                                              | Yes                 |
| Pu.1   | $Gfi1 \vee Erg$                        | 67                                              | Yes                 |
| Myb    | <i>HoxB4</i>                           | 64                                              | Yes                 |

**Supplementary Table 3:** Boolean update rules after multiple rounds of bootstrapping (a-e). In general, the number of possible solutions for a gene's update function grows as the amount of data used is decreased, and including the full data set narrows these possibilities.

**Supplementary Table 3a**

| Gene   | Synthesised update functions                                           | % Non-observed transitions disallowed ( $N_i$ ) |
|--------|------------------------------------------------------------------------|-------------------------------------------------|
| Scl    | <i>Hhex</i>                                                            | 96                                              |
|        | <i>Sox7</i>                                                            | 98                                              |
|        | <i>Etv2</i>                                                            | 98                                              |
|        | <b><i>Fli1</i></b>                                                     | 99                                              |
|        | <i>Ets1</i>                                                            | 100                                             |
|        | <i>Scl</i>                                                             | 100                                             |
|        | Etv2                                                                   | No solution                                     |
| Fli1   | <b><i>Etv2</i></b>                                                     | 98                                              |
|        | <b><i>Sox7</i></b>                                                     | 98                                              |
|        | <i>Notch1</i>                                                          | 98                                              |
| Lyl1   | <i>Etv2</i>                                                            | 90                                              |
|        | <i>Notch1</i>                                                          | 91                                              |
|        | <b><i>Sox7</i></b>                                                     | 92                                              |
| Sox7   | <b><i>Sox17</i> <math>\vee</math> <i>HoxB4</i></b>                     | 85                                              |
| Erg    | <i>Sox7</i> $\vee$ <i>HoxB4</i>                                        | 90                                              |
|        | <i>Sox7</i> $\vee$ <i>Notch1</i>                                       | 89                                              |
|        | <i>Sox7</i>                                                            | 89                                              |
|        | <i>Notch1</i>                                                          | 89                                              |
|        | <i>Sox7</i> $\wedge$ <i>Notch1</i>                                     | 88                                              |
|        | <u><i>Sox17</i> <math>\vee</math> <i>HoxB4</i></u>                     | 84                                              |
|        | Notch1                                                                 | No solution                                     |
| Gata1  | <u><i>Gfi1</i></u>                                                     | 89                                              |
| HoxB4  | <u><i>Lyl1</i></u>                                                     | 76                                              |
| Sox17  | <b><i>Lyl1</i> <math>\wedge</math> <math>\neg</math> <i>Gfi1b</i></b>  | 78                                              |
| Ets1   | <i>Sox7</i>                                                            | 98                                              |
|        | <b><i>Notch1</i></b>                                                   | 99                                              |
| Gfi1   | <i>Gfi1b</i> $\wedge$ $\neg$ <i>Sox17</i>                              | 88                                              |
|        | <i>Nfe2</i> $\wedge$ $\neg$ <i>Sox17</i>                               | 90                                              |
|        | <i>Gata1</i>                                                           | 90                                              |
|        | <b><i>Gata1</i> <math>\wedge</math> <math>\neg</math> <i>Sox17</i></b> | 91                                              |
| Gfi1b  | <i>Gata1</i>                                                           | 87                                              |
|        | <b><i>Nfe2</i> <math>\wedge</math> <i>Myb</i></b>                      | 87                                              |
|        | <i>Nfe2</i> $\wedge$ <i>Ikaros</i>                                     | 86                                              |
|        | <b><i>Pu.1</i> <math>\wedge</math> <i>Nfe2</i></b>                     | 86                                              |
|        | <i>Sox7</i> $\wedge$ <i>Gata1</i>                                      | 86                                              |
|        | <i>Pu.1</i> $\wedge$ <i>Myb</i>                                        | 85                                              |
| Eto2   | <u><i>Ets1</i></u>                                                     | 95                                              |
|        | <b><i>Sox7</i></b>                                                     | 94                                              |
|        | <b><i>Hhex</i></b>                                                     | 93                                              |
|        | <i>Notch1</i>                                                          | 93                                              |
|        | <i>Etv2</i>                                                            | 93                                              |
|        | Hhex                                                                   | <b><i>Sox7</i></b><br><b><i>Notch1</i></b>      |
| Ikaros | <b><i>Nfe2</i> <math>\vee</math> <i>Gfi1b</i></b>                      | 81                                              |
| Lmo2   | <i>Notch1</i>                                                          | 79                                              |
|        | <u><i>Sox7</i></u>                                                     | 79                                              |
| Nfe2   | <b><i>Ikaros</i></b>                                                   | 75                                              |
|        | <i>Gfi1</i>                                                            | 81                                              |

Continued on next page

continued from previous page

| Gene | Synthesised update functions                | % Non-observed transitions disallowed ( $N_i$ ) |
|------|---------------------------------------------|-------------------------------------------------|
|      | <i>Gfi1b</i>                                | 83                                              |
|      | <i>Gata1</i>                                | 84                                              |
| Pu.1 | <i>Erg</i>                                  | 71                                              |
|      | <i>Sox7</i> $\wedge$ <i>Eto2</i>            | 71                                              |
|      | <i>Lyl1</i> $\wedge$ <i>Erg</i>             | 71                                              |
|      | <i>Notch1</i> $\wedge$ <i>Eto2</i>          | 71                                              |
|      | <b><i>Gfi1</i></b> $\vee$ <b><i>Erg</i></b> | 72                                              |
|      | <i>HoxB4</i> $\vee$ <i>Erg</i>              | 72                                              |
|      | <i>Erg</i> $\wedge$ <i>Eto2</i>             | 73                                              |
|      | <i>Ikaros</i> $\wedge$ <i>Erg</i>           | 73                                              |
|      | <i>Notch1</i> $\wedge$ <i>Ikaros</i>        | 75                                              |
|      | <i>Sox7</i> $\wedge$ <i>Ikaros</i>          | 75                                              |
| Myb  | <b><i>HoxB4</i></b>                         | 60                                              |
|      | <i>Gfi1</i>                                 | 67                                              |

Supplementary Table 3b

| Gene   | Synthesised update functions                                           | % Non-observed transitions disallowed ( $N_i$ ) |
|--------|------------------------------------------------------------------------|-------------------------------------------------|
| Scl    | <i>Hhex</i>                                                            | 96                                              |
|        | <i>Notch1</i>                                                          | 96                                              |
|        | <i>Etv2</i>                                                            | 96                                              |
|        | <i>Ets1</i>                                                            | 97                                              |
|        | <i>Sox7</i>                                                            | 98                                              |
|        | <b><i>Fli1</i></b>                                                     | 98                                              |
| Etv2   | No solution                                                            |                                                 |
| Fli1   | <i>Notch1</i>                                                          | 96                                              |
|        | <b><i>Etv2</i></b>                                                     | 96                                              |
|        | <b><i>Sox7</i></b>                                                     | 98                                              |
| Lyl1   | <i>Erg</i>                                                             | 84                                              |
|        | <i>Notch1</i>                                                          | 87                                              |
|        | <i>Etv2</i>                                                            | 87                                              |
|        | <b><i>Sox7</i></b>                                                     | 91                                              |
| Sox7   | <i>Sox17</i> $\vee$ <i>Erg</i>                                         | 90                                              |
|        | <i>HoxB4</i> $\vee$ <i>Erg</i>                                         | 88                                              |
|        | <i>Gfi1</i> $\vee$ <i>Erg</i>                                          | 85                                              |
|        | <b><i>Sox17</i> <math>\vee</math> <i>HoxB4</i></b>                     | 84                                              |
|        | <i>Scl</i> $\wedge$ <i>Erg</i>                                         | 82                                              |
|        | <i>Fli1</i> $\wedge$ <i>Erg</i>                                        | 82                                              |
|        | <i>Erg</i>                                                             | 82                                              |
| Erg    | <i>Notch1</i> $\wedge$ <i>Etv2</i>                                     | 81                                              |
|        | <b><i>Sox17</i> <math>\vee</math> <i>HoxB4</i></b>                     | 83                                              |
|        | <i>Sox7</i> $\wedge$ <i>Notch1</i>                                     | 85                                              |
| Notch1 | No solution                                                            |                                                 |
| Gata1  | <u><i>Gfi1</i></u>                                                     | 84                                              |
|        | <i>Gfi1b</i> $\wedge$ <i>Ets1</i>                                      | 85                                              |
|        | <b><i>Lmo2</i> <math>\wedge</math> <i>Gfi1b</i></b>                    | 87                                              |
| HoxB4  | <u><i>Lyl1</i></u>                                                     | 75                                              |
| Sox17  | <b><i>Lyl1</i> <math>\wedge</math> <math>\neg</math> <i>Gfi1b</i></b>  | 78                                              |
| Ets1   | <i>Sox7</i>                                                            | 95                                              |
|        | <b><i>Notch1</i></b>                                                   | 97                                              |
| Gfi1   | <u><i>Gata1</i></u>                                                    | 86                                              |
|        | <b><i>Nfe2</i> <math>\wedge</math> <math>\neg</math> <i>Sox17</i></b>  | 88                                              |
|        | <i>Gfi1b</i> $\wedge$ $\neg$ <i>Sox17</i>                              | 88                                              |
|        | <b><i>Gata1</i> <math>\wedge</math> <math>\neg</math> <i>Sox17</i></b> | 88                                              |
|        | <i>Gfi1b</i> $\wedge$ $\neg$ <i>Erg</i>                                | 87                                              |
|        | <i>Gata1</i> $\wedge$ $\neg$ <i>Erg</i>                                | 86                                              |
|        | <i>Nfe2</i> $\wedge$ $\neg$ <i>Hhex</i>                                | 86                                              |
|        | <i>Gata1</i> $\wedge$ $\neg$ <i>Hhex</i>                               | 86                                              |
|        | <i>Ikaros</i> $\wedge$ $\neg$ <i>Hhex</i>                              | 86                                              |
|        | <i>Nfe2</i> $\wedge$ $\neg$ <i>Erg</i>                                 | 86                                              |
| Gfi1b  | <i>Gfi1</i>                                                            | 81                                              |
|        | <b><i>Pu.1</i> <math>\wedge</math> <i>Nfe2</i></b>                     | 88                                              |
|        | <b><i>Nfe2</i> <math>\wedge</math> <i>Myb</i></b>                      | 89                                              |
| Eto2   | <b><i>Sox7</i></b>                                                     | 94                                              |
|        | <b><i>Hhex</i></b>                                                     | 93                                              |
|        | <u><i>Ets1</i></u>                                                     | 92                                              |
|        | <i>Etv2</i>                                                            | 91                                              |
|        | <i>Notch1</i>                                                          | 91                                              |
| Hhex   | <b><i>Notch1</i></b>                                                   | 94                                              |

Continued on next page

continued from previous page

| Gene   | Synthesised update functions         | % Non-observed transitions disallowed ( $N_i$ ) |
|--------|--------------------------------------|-------------------------------------------------|
|        | <b>Sox7</b>                          | 97                                              |
| Ikaros | <i>Myb</i> $\wedge$ <i>Eto2</i>      | 80                                              |
|        | <b>Nfe2</b> $\vee$ <b>Gata1</b>      | 81                                              |
|        | <b>Nfe2</b> $\vee$ <b>Gfi1</b>       | 82                                              |
|        | <b>Nfe2</b> $\vee$ <b>Gfi1b</b>      | 83                                              |
| Lmo2   | <u>Sox7</u>                          | 78                                              |
| Nfe2   | <b>Ikaros</b>                        | 77                                              |
|        | <i>Gfi1</i>                          | 80                                              |
|        | <i>Gata1</i>                         | 83                                              |
|        | <i>Gfi1b</i>                         | 86                                              |
| Pu.1   | <i>Nfe2</i> $\wedge$ <i>Erg</i>      | 67                                              |
|        | <i>HoxB4</i> $\wedge$ <i>Gfi1b</i>   | 67                                              |
|        | <i>Myb</i> $\wedge$ <i>Erg</i>       | 67                                              |
|        | <i>Sox7</i> $\wedge$ <i>Myb</i>      | 67                                              |
|        | <i>Erg</i> $\wedge$ <i>Eto2</i>      | 68                                              |
|        | <b>Gfi1</b> $\vee$ <b>Erg</b>        | 68                                              |
|        | <i>Lyl1</i> $\wedge$ <i>Erg</i>      | 68                                              |
|        | <i>Notch1</i> $\wedge$ <i>Nfe2</i>   | 68                                              |
|        | <i>Tbx20</i> $\wedge$ <i>Gfi1b</i>   | 68                                              |
|        | <i>Sox7</i> $\wedge$ <i>Nfe2</i>     | 69                                              |
|        | <i>Gfi1b</i> $\wedge$ <i>Erg</i>     | 72                                              |
|        | <i>Ikaros</i> $\wedge$ <i>Erg</i>    | 73                                              |
|        | <i>Notch1</i> $\wedge$ <i>Gfi1b</i>  | 74                                              |
|        | <i>Sox7</i> $\wedge$ <i>Gfi1b</i>    | 75                                              |
|        | <i>Notch1</i> $\wedge$ <i>Ikaros</i> | 75                                              |
|        | <i>Sox7</i> $\wedge$ <i>Ikaros</i>   | 75                                              |
| Myb    | <b>HoxB4</b>                         | 65                                              |
|        | <i>Gfi1</i>                          | 66                                              |



Supplementary Table 3c

| Gene                                              | Synthesised update functions                                           | % Non-observed transitions disallowed ( $N_i$ ) |
|---------------------------------------------------|------------------------------------------------------------------------|-------------------------------------------------|
| Scl                                               | <i>Hhex</i>                                                            | 97                                              |
|                                                   | <i>Notch1</i>                                                          | 97                                              |
|                                                   | <i>Sox7</i>                                                            | 98                                              |
|                                                   | <i>Etv2</i>                                                            | 98                                              |
|                                                   | <b><i>Fli1</i></b>                                                     | 99                                              |
|                                                   | <i>Ets1</i>                                                            | 100                                             |
|                                                   | <i>Scl</i>                                                             | 100                                             |
| Etv2                                              | No solution                                                            |                                                 |
| Fli1                                              | <i>Notch1</i>                                                          | 97                                              |
|                                                   | <b><i>Etv2</i></b>                                                     | 97                                              |
|                                                   | <b><i>Sox7</i></b>                                                     | 98                                              |
| Lyl1                                              | <i>Notch1</i>                                                          | 90                                              |
|                                                   | <b><i>Sox7</i></b>                                                     | 92                                              |
| Sox7                                              | <b><i>Sox17</i> <math>\vee</math> <i>HoxB4</i></b>                     | 85                                              |
| Erg                                               | <i>Sox7</i>                                                            | 88                                              |
|                                                   | <i>Notch1</i>                                                          | 89                                              |
|                                                   | <u><i>Sox17</i> <math>\vee</math> <i>HoxB4</i></u>                     | 85                                              |
| Notch1                                            | No solution                                                            |                                                 |
| HoxB4                                             | <u><i>Lyl1</i></u>                                                     | 76                                              |
| Sox17                                             | <b><i>Lyl1</i> <math>\wedge</math> <math>\neg</math> <i>Gfi1b</i></b>  | 75                                              |
|                                                   | <i>Erg</i> $\wedge$ $\neg$ <i>Gfi1b</i>                                | 74                                              |
|                                                   | <i>Fli1</i> $\wedge$ $\neg$ <i>Gfi1b</i>                               | 74                                              |
|                                                   | <u><i>Eto2</i> <math>\wedge</math> <math>\neg</math> <i>Gfi1b</i></u>  | 74                                              |
|                                                   | <u><i>Sox7</i> <math>\wedge</math> <math>\neg</math> <i>Gfi1b</i></u>  | 74                                              |
|                                                   | <i>Lyl1</i> $\wedge$ $\neg$ <i>Gata1</i>                               | 73                                              |
| Ets1                                              | <b><i>Notch1</i></b>                                                   | 98                                              |
|                                                   | <i>Sox7</i>                                                            | 98                                              |
| Gfi1                                              | <i>Gfi1b</i> $\wedge$ $\neg$ <i>Sox17</i>                              | 86                                              |
|                                                   | <u><i>Gata1</i></u>                                                    | 87                                              |
|                                                   | <b><i>Nfe2</i> <math>\wedge</math> <math>\neg</math> <i>Sox17</i></b>  | 87                                              |
|                                                   | <b><i>Gata1</i> <math>\wedge</math> <math>\neg</math> <i>Sox17</i></b> | 89                                              |
| Gfi1b                                             | <i>Gfi1</i> $\wedge$ <i>Eto2</i>                                       | 80                                              |
|                                                   | <i>Ikaros</i> $\wedge$ <i>Gfi1</i>                                     | 80                                              |
|                                                   | <i>Nfe2</i> $\wedge$ <i>Ets1</i>                                       | 82                                              |
|                                                   | <i>Notch1</i> $\wedge$ <i>Gata1</i>                                    | 82                                              |
|                                                   | <i>Myb</i> $\wedge$ <i>Ikaros</i>                                      | 83                                              |
|                                                   | <i>Gata1</i> $\wedge$ <i>Etv2</i>                                      | 83                                              |
|                                                   | <b><i>Pu.1</i> <math>\wedge</math> <i>Nfe2</i></b>                     | 83                                              |
|                                                   | <i>Sox7</i> $\wedge$ <i>Gata1</i>                                      | 83                                              |
|                                                   | <i>Pu.1</i> $\wedge$ <i>Gata1</i>                                      | 84                                              |
|                                                   | <b><i>Pu.1</i> <math>\wedge</math> <i>Ikaros</i></b>                   | 84                                              |
|                                                   | <b><i>Pu.1</i> <math>\wedge</math> <i>Myb</i></b>                      | 84                                              |
|                                                   | <i>Gata1</i> $\wedge$ <i>Ets1</i>                                      | 85                                              |
|                                                   | <i>Myb</i> $\wedge$ <i>Gata1</i>                                       | 85                                              |
| <b><i>Nfe2</i> <math>\wedge</math> <i>Myb</i></b> | 85                                                                     |                                                 |
| Eto2                                              | <u><i>Ets1</i></u>                                                     | 96                                              |
|                                                   | <b><i>Sox7</i></b>                                                     | 95                                              |
|                                                   | <b><i>Hhex</i></b>                                                     | 94                                              |
|                                                   | <i>Etv2</i>                                                            | 94                                              |
|                                                   | <i>Notch1</i>                                                          | 93                                              |
| Hhex                                              | <b><i>Notch1</i></b>                                                   | 96                                              |

Continued on next page

continued from previous page

| Gene   | Synthesised update functions                      | % Non-observed transitions disallowed ( $N_i$ ) |
|--------|---------------------------------------------------|-------------------------------------------------|
|        | <b>Sox7</b>                                       | 97                                              |
| Ikaros | <i>Myb</i>                                        | 80                                              |
|        | <i>Myb</i> $\wedge$ <i>Ets1</i>                   | 80                                              |
|        | <i>Myb</i> $\wedge$ <i>Fli1</i>                   | 80                                              |
|        | <i>Scl</i> $\wedge$ <i>Myb</i>                    | 80                                              |
|        | <i>Myb</i> $\wedge$ <i>Lyl1</i>                   | 80                                              |
|        | <i>Myb</i> $\vee$ <i>Gfi1</i>                     | 80                                              |
|        | <i>Myb</i> $\vee$ <i>Gata1</i>                    | 81                                              |
|        | <i>Myb</i> $\vee$ <i>Gfi1b</i>                    | 81                                              |
|        | <i>Nfe2</i> $\vee$ <i>Myb</i>                     | 81                                              |
|        | <i>Myb</i> $\wedge$ <i>Eto2</i>                   | 82                                              |
|        | <b><i>Nfe2</i> <math>\vee</math> <i>Gata1</i></b> | 82                                              |
|        | <b><i>Nfe2</i> <math>\vee</math> <i>Gfi1</i></b>  | 82                                              |
|        | <b><i>Nfe2</i> <math>\vee</math> <i>Gfi1b</i></b> | 83                                              |
| Lmo2   | <u><i>Sox7</i></u>                                | 79                                              |
|        | <i>Notch1</i>                                     | 78                                              |
| Nfe2   | <b><i>Ikaros</i></b>                              | 77                                              |
|        | <i>Gfi1</i>                                       | 79                                              |
|        | <i>Gfi1b</i>                                      | 83                                              |
|        | <i>Gata1</i>                                      | 84                                              |
| Pu.1   | <u><i>Erg</i></u>                                 | 67                                              |
|        | <i>Scl</i> $\wedge$ <i>Erg</i>                    | 67                                              |
|        | <i>Ets1</i> $\wedge$ <i>Erg</i>                   | 67                                              |
|        | <i>Fli1</i> $\wedge$ <i>Erg</i>                   | 67                                              |
|        | <i>Notch1</i> $\wedge$ <i>Eto2</i>                | 68                                              |
|        | <i>HoxB4</i> $\vee$ <i>Erg</i>                    | 68                                              |
|        | <i>Sox7</i> $\wedge$ <i>Eto2</i>                  | 68                                              |
|        | <i>Erg</i> $\wedge$ <i>Eto2</i>                   | 69                                              |
|        | <i>Gfi1b</i> $\wedge$ <i>Erg</i>                  | 69                                              |
|        | <i>Notch1</i> $\wedge$ <i>Lyl1</i>                | 69                                              |
|        | <b><i>Gfi1</i> <math>\vee</math> <i>Erg</i></b>   | 70                                              |
|        | <i>Ikaros</i> $\wedge$ <i>Erg</i>                 | 70                                              |
|        | <i>Lyl1</i> $\wedge$ <i>Erg</i>                   | 70                                              |
|        | <i>Notch1</i> $\wedge$ <i>Gfi1b</i>               | 70                                              |
|        | <i>Sox7</i> $\wedge$ <i>Lyl1</i>                  | 70                                              |
|        | <i>Sox7</i> $\wedge$ <i>Gfi1b</i>                 | 71                                              |
|        | <i>Notch1</i> $\wedge$ <i>Ikaros</i>              | 72                                              |
|        | <i>Sox7</i> $\wedge$ <i>Ikaros</i>                | 73                                              |
| Myb    | <i>Gfi1</i>                                       | 64                                              |
|        | <b><i>HoxB4</i></b>                               | 62                                              |
|        | <i>Erg</i>                                        | 62                                              |

Supplementary Table 3d

| Gene   | Synthesised update functions        | % Non-observed transitions disallowed ( $N_i$ ) |
|--------|-------------------------------------|-------------------------------------------------|
| Scl    | <i>Etv2</i>                         | 96                                              |
|        | <i>Notch1</i>                       | 96                                              |
|        | <i>Ets1</i>                         | 96                                              |
|        | <i>Hhex</i>                         | 96                                              |
|        | <b><i>Fli1</i></b>                  | 97                                              |
|        | <i>Sox7</i>                         | 97                                              |
| Etv2   | No solution                         |                                                 |
| Fli1   | <i>Notch1</i>                       | 96                                              |
|        | <b><i>Etv2</i></b>                  | 96                                              |
|        | <b><i>Sox7</i></b>                  | 98                                              |
| Lyl1   | <i>Notch1</i>                       | 86                                              |
|        | <i>Erg</i>                          | 88                                              |
|        | <b><i>Sox7</i></b>                  | 91                                              |
| Sox7   | <i>Lmo2</i> ∨ <i>HoxB4</i>          | 89                                              |
|        | <i>Sox17</i> ∨ <i>Erg</i>           | 89                                              |
|        | <i>HoxB4</i> ∨ <i>Erg</i>           | 87                                              |
|        | <i>Gfi1</i> ∨ <i>Erg</i>            | 85                                              |
|        | <i>Sox17</i> ∨ <i>Lmo2</i>          | 85                                              |
|        | <i>Scl</i> ∧ <i>Erg</i>             | 83                                              |
|        | <i>Fli1</i> ∧ <i>Erg</i>            | 84                                              |
|        | <i>Erg</i>                          | 83                                              |
|        | <b><i>Sox17</i> ∨ <i>HoxB4</i></b>  | 83                                              |
| Erg    | <i>Sox7</i>                         | 86                                              |
|        | <i>Notch1</i>                       | 82                                              |
|        | <i>Sox7</i> ∨ <i>Gfi1</i>           | 86                                              |
|        | <u><i>Sox17</i> ∨ <i>HoxB4</i></u>  | 87                                              |
|        | <i>Sox7</i> ∧ <i>Fli1</i>           | 87                                              |
|        | <i>Notch1</i> ∧ <i>Eto2</i>         | 88                                              |
|        | <i>Sox7</i> ∧ <i>Eto2</i>           | 89                                              |
|        | <i>Notch1</i> ∧ <i>Lyl1</i>         | 90                                              |
|        | <i>Sox7</i> ∧ <i>Lyl1</i>           | 90                                              |
| Notch1 | No solution                         |                                                 |
| Gata1  | <u><i>Gfi1b</i></u>                 | 85                                              |
|        | <i>Gfi1</i>                         | 88                                              |
| HoxB4  | <u><i>Lyl1</i></u> ∧ ¬ <i>Gfi1</i>  | 64                                              |
| Sox17  | <b><i>Lyl1</i> ∧ ¬<i>Gfi1b</i></b>  | 78                                              |
|        | <i>Erg</i> ∧ ¬ <i>Gfi1b</i>         | 76                                              |
|        | <i>Lyl1</i> ∧ ¬ <i>Gata1</i>        | 75                                              |
|        | <i>Erg</i> ∧ ¬ <i>Gata1</i>         | 74                                              |
|        | <u><i>Eto2</i> ∧ ¬<i>Gfi1b</i></u>  | 73                                              |
|        | <i>Lyl1</i> ∧ ¬ <i>Myb</i>          | 72                                              |
|        | <i>Hhex</i> ∧ ¬ <i>Gfi1b</i>        | 72                                              |
|        | <u><i>Sox7</i> ∧ ¬<i>Gfi1b</i></u>  | 72                                              |
|        | <i>Erg</i> ∧ ¬ <i>Gfi1</i>          | 71                                              |
|        | <i>Lyl1</i> ∧ ¬ <i>Gfi1</i>         | 71                                              |
| Ets1   | <i>Sox7</i>                         | 94                                              |
|        | <b><i>Notch1</i></b>                | 97                                              |
| Gfi1   | <u><i>Gata1</i></u>                 | 88                                              |
|        | <b><i>Gata1</i> ∧ ¬<i>Sox17</i></b> | 89                                              |
| Gfi1b  | <i>Gata1</i>                        | 85                                              |
|        | <u><i>Nfe2</i></u>                  | 84                                              |

Continued on next page

continued from previous page

| Gene   | Synthesised update functions           | % Non-observed transitions disallowed ( $N_i$ ) |
|--------|----------------------------------------|-------------------------------------------------|
|        | $Nfe2 \vee Gfi1$                       | 85                                              |
|        | $Nfe2 \vee Gata1$                      | 86                                              |
|        | <b>Pu.1 <math>\wedge</math> Nfe2</b>   | 86                                              |
|        | $Myb \wedge Gata1$                     | 86                                              |
|        | <b>Pu.1 <math>\wedge</math> Ikaros</b> | 86                                              |
|        | $Nfe2 \wedge Ikaros$                   | 87                                              |
|        | <b>Pu.1 <math>\wedge</math> Myb</b>    | 87                                              |
|        | <b>Nfe2 <math>\wedge</math> Myb</b>    | 88                                              |
|        | $Gfi1 \vee Gata1$                      | 88                                              |
| Eto2   | <u>Fli1</u>                            | 93                                              |
|        | <b>Sox7</b>                            | 92                                              |
|        | <i>Scl</i>                             | 92                                              |
|        | <b>Hhex</b>                            | 92                                              |
|        | <i>Lyl1</i>                            | 92                                              |
|        | <u>Ets1</u>                            | 90                                              |
| Hhex   | <b>Notch1</b>                          | 94                                              |
|        | <b>Sox7</b>                            | 97                                              |
| Ikaros | $Myb \vee Gfi1b$                       | 80                                              |
|        | $Myb \wedge Lyl1$                      | 81                                              |
|        | <b>Nfe2 <math>\vee</math> Gata1</b>    | 81                                              |
|        | $Myb \wedge Eto2$                      | 82                                              |
|        | <b>Nfe2 <math>\vee</math> Gfi1b</b>    | 83                                              |
| Lmo2   | <u>Sox7</u>                            | 76                                              |
|        | <u>Erg</u>                             | 72                                              |
| Nfe2   | <i>Myb</i>                             | 70                                              |
|        | <b>Ikaros</b>                          | 76                                              |
|        | <i>Gfi1</i>                            | 81                                              |
|        | <i>Gata1</i>                           | 85                                              |
|        | <i>Gfi1b</i>                           | 86                                              |
| Pu.1   | <u>Erg</u>                             | 69                                              |
|        | $Gfi1b \wedge Erg$                     | 74                                              |
|        | $Notch1 \wedge Gfi1b$                  | 75                                              |
|        | $Sox7 \wedge Gfi1b$                    | 75                                              |
| Myb    | <i>Erg</i>                             | 62                                              |
|        | <i>Gfi1</i>                            | 64                                              |
|        | <b>HoxB4</b>                           | 66                                              |

Supplementary Table 3e

| Gene                                                                  | Synthesised update functions                                           | % Non-observed transitions disallowed ( $N_i$ ) |
|-----------------------------------------------------------------------|------------------------------------------------------------------------|-------------------------------------------------|
| Scl                                                                   | <i>Lyl1</i>                                                            | 96                                              |
|                                                                       | <i>Hhex</i>                                                            | 97                                              |
|                                                                       | <i>Eto2</i>                                                            | 97                                              |
|                                                                       | <i>Notch1</i>                                                          | 97                                              |
|                                                                       | <i>Etv2</i>                                                            | 98                                              |
|                                                                       | <i>Sox7</i>                                                            | 98                                              |
|                                                                       | <i>Ets1</i>                                                            | 100                                             |
|                                                                       | <b><i>Fli1</i></b>                                                     | 100                                             |
|                                                                       | <i>Scl</i>                                                             | 100                                             |
| Etv2                                                                  | <b><i>Notch1</i></b>                                                   | 96                                              |
|                                                                       | <i>Sox7</i>                                                            | 98                                              |
| Fli1                                                                  | <i>Meis1</i>                                                           | 90                                              |
|                                                                       | <i>Notch1</i>                                                          | 97                                              |
|                                                                       | <b><i>Etv2</i></b>                                                     | 98                                              |
|                                                                       | <b><i>Sox7</i></b>                                                     | 98                                              |
| Lyl1                                                                  | <i>Hhex</i>                                                            | 95                                              |
|                                                                       | <i>Notch1</i>                                                          | 95                                              |
|                                                                       | <b><i>Sox7</i></b>                                                     | 97                                              |
| Sox7                                                                  | <b><i>Sox17</i> <math>\vee</math> <i>HoxB4</i></b>                     | 88                                              |
| Erg                                                                   | <i>Notch1</i>                                                          | 91                                              |
|                                                                       | <i>Sox7</i>                                                            | 90                                              |
| Notch1                                                                | No solution                                                            |                                                 |
| Gata1                                                                 | <i>Gfi1</i>                                                            | 85                                              |
| HoxB4                                                                 | <i>Sox17</i> $\vee$ <i>Lmo2</i>                                        | 67                                              |
|                                                                       | <i>Eto2</i> $\wedge$ $\neg$ <i>Gfi1</i>                                | 59                                              |
|                                                                       | <u><i>Lyl1</i></u> $\wedge$ $\neg$ <i>Gfi1</i>                         | 59                                              |
|                                                                       | <i>Fli1</i> $\wedge$ $\neg$ <i>Gfi1</i>                                | 59                                              |
|                                                                       | <i>Scl</i> $\wedge$ $\neg$ <i>Gfi1</i>                                 | 59                                              |
|                                                                       | <i>Lmo2</i>                                                            | 57                                              |
|                                                                       | Sox17                                                                  | <i>Fli1</i> $\wedge$ $\neg$ <i>Gfi1b</i>        |
| <i>Sox7</i> $\wedge$ $\neg$ <i>Gfi1b</i>                              |                                                                        | 79                                              |
| <i>Scl</i> $\wedge$ $\neg$ <i>Gfi1b</i>                               |                                                                        | 79                                              |
| <i>Ets1</i> $\wedge$ $\neg$ <i>Gfi1b</i>                              |                                                                        | 79                                              |
| <i>Etv2</i> $\wedge$ $\neg$ <i>Gfi1b</i>                              |                                                                        | 79                                              |
| <i>Notch1</i> $\wedge$ $\neg$ <i>Gfi1b</i>                            |                                                                        | 79                                              |
| <i>Hhex</i> $\wedge$ $\neg$ <i>Gfi1b</i>                              |                                                                        | 78                                              |
| <i>Eto2</i> $\wedge$ $\neg$ <i>Gfi1b</i>                              |                                                                        | 77                                              |
| <b><i>Lyl1</i> <math>\wedge</math> <math>\neg</math> <i>Gfi1b</i></b> |                                                                        | 75                                              |
| Ets1                                                                  | <b><i>Notch1</i></b>                                                   | 97                                              |
|                                                                       | <i>Sox7</i>                                                            | 98                                              |
| Gfi1                                                                  | <u><i>Gata1</i></u>                                                    | 87                                              |
|                                                                       | <b><i>Nfe2</i> <math>\wedge</math> <math>\neg</math> <i>Sox17</i></b>  | 87                                              |
|                                                                       | <b><i>Gata1</i> <math>\wedge</math> <math>\neg</math> <i>Sox17</i></b> | 88                                              |
| Gfi1b                                                                 | <i>Notch1</i> $\wedge$ <i>Gata1</i>                                    | 81                                              |
|                                                                       | <i>Nfe2</i> $\wedge$ <i>Etv2</i>                                       | 81                                              |
|                                                                       | <i>Sox7</i> $\wedge$ <i>Nfe2</i>                                       | 81                                              |
|                                                                       | <i>Gata1</i> $\wedge$ <i>Etv2</i>                                      | 82                                              |
|                                                                       | <i>Sox7</i> $\wedge$ <i>Gata1</i>                                      | 82                                              |
|                                                                       | <i>Pu.1</i> $\wedge$ <i>Gata1</i>                                      | 82                                              |
|                                                                       | <i>Nfe2</i> $\wedge$ <i>Ets1</i>                                       | 83                                              |
|                                                                       | <i>Gata1</i> $\wedge$ <i>Ets1</i>                                      | 84                                              |

Continued on next page

continued from previous page

| Gene   | Synthesised update functions                  | % Non-observed transitions disallowed ( $N_i$ ) |
|--------|-----------------------------------------------|-------------------------------------------------|
|        | <i>Myb</i> $\wedge$ <i>Ikaros</i>             | 84                                              |
|        | <i>Myb</i> $\wedge$ <i>Gata1</i>              | 84                                              |
|        | <b><i>Pu.1</i></b> $\wedge$ <i>Ikaros</i>     | 84                                              |
|        | <b><i>Pu.1</i></b> $\wedge$ <i>Myb</i>        | 85                                              |
|        | <b><i>Pu.1</i></b> $\wedge$ <i>Nfe2</i>       | 85                                              |
|        | <b><i>Nfe2</i></b> $\wedge$ <i>Myb</i>        | 86                                              |
| Eto2   | <u><i>Ets1</i></u>                            | 99                                              |
|        | <b><i>Sox7</i></b>                            | 97                                              |
|        | <i>Etv2</i>                                   | 97                                              |
|        | <i>Notch1</i>                                 | 96                                              |
|        | <b><i>Hhex</i></b>                            | 96                                              |
| Hhex   | <b><i>Notch1</i></b>                          | 96                                              |
|        | <b><i>Sox7</i></b>                            | 98                                              |
| Ikaros | <i>Myb</i> $\wedge$ <i>Lyl1</i>               | 80                                              |
|        | <i>Myb</i> $\vee$ <i>Gata1</i>                | 80                                              |
|        | <i>Myb</i> $\vee$ <i>Gfi1</i>                 | 80                                              |
|        | <i>Myb</i> $\vee$ <i>Mitf</i>                 | 80                                              |
|        | <i>Myb</i> $\vee$ <i>Gfi1b</i>                | 81                                              |
|        | <i>Nfe2</i> $\vee$ <i>Myb</i>                 | 81                                              |
|        | <b><i>Nfe2</i></b> $\vee$ <b><i>Gfi1b</i></b> | 82                                              |
| Lmo2   | <u><i>Sox7</i></u>                            | 78                                              |
|        | <i>Notch1</i>                                 | 78                                              |
|        | <i>Notch1</i> $\vee$ <i>Erg</i>               | 79                                              |
|        | <b><i>Sox7</i></b> $\vee$ <b><i>Gfi1</i></b>  | 79                                              |
|        | <b><i>Sox7</i></b> $\vee$ <b><i>HoxB4</i></b> | 79                                              |
|        | <b><i>Sox7</i></b> $\vee$ <i>Erg</i>          | 79                                              |
|        | <i>Sox7</i> $\vee$ <i>Notch1</i>              | 79                                              |
| Nfe2   | <i>Myb</i>                                    | 71                                              |
|        | <b><i>Ikaros</i></b>                          | 74                                              |
|        | <i>Gfi1</i>                                   | 80                                              |
|        | <i>Gata1</i>                                  | 82                                              |
|        | <i>Gfi1b</i>                                  | 84                                              |
| Pu.1   | <u><i>Erg</i></u>                             | 68                                              |
|        | <i>Sox7</i>                                   | 67                                              |
| Myb    | <i>Erg</i>                                    | 62                                              |
|        | <i>Gfi1</i>                                   | 63                                              |
|        | <b><i>HoxB4</i></b>                           | 65                                              |

**Supplementary Table 4:** Boolean update rules synthesised from data filtered according to a more stringent limit of detection (Ct 23).

| Gene   | Synthesised update functions                                           | % Non-observed transitions disallowed ( $N_i$ ) |
|--------|------------------------------------------------------------------------|-------------------------------------------------|
| Scl    | <i>Scl</i>                                                             | 100                                             |
|        | <b><i>Fli1</i></b>                                                     | 99                                              |
|        | <i>Sox7</i>                                                            | 99                                              |
| Etv2   | <i>Sox7</i>                                                            | 98                                              |
|        | <b><i>Notch1</i></b>                                                   | 94                                              |
| Fli1   | <i>Scl</i>                                                             | 99                                              |
|        | <i>Ets1</i>                                                            | 99                                              |
|        | <b><i>Sox7</i></b>                                                     | 98                                              |
|        | <b><i>Etv2</i></b>                                                     | 98                                              |
|        | <i>Hhex</i>                                                            | 97                                              |
|        |                                                                        |                                                 |
| Lyl1   | <i>Fli1</i>                                                            | 93                                              |
|        | <i>Eto2</i>                                                            | 93                                              |
|        | <i>Scl</i>                                                             | 93                                              |
|        | <i>Ets1</i>                                                            | 93                                              |
|        | <b><i>Sox7</i></b>                                                     | 91                                              |
|        | <i>Hhex</i>                                                            | 91                                              |
|        | <i>Etv2</i>                                                            | 91                                              |
|        |                                                                        |                                                 |
| Sox7   | <i>Notch1</i>                                                          | 95                                              |
|        | <b><i>Sox17</i> <math>\vee</math> <i>HoxB4</i></b>                     | 96                                              |
| Erg    | <i>Sox7</i>                                                            | 87                                              |
|        | <i>Notch1</i>                                                          | 84                                              |
|        | <u><i>HoxB4</i> <math>\vee</math> <i>Sox17</i></u>                     | 85                                              |
| Notch1 | <b><i>Sox7</i></b>                                                     | 96                                              |
|        | <i>Scl</i>                                                             | 96                                              |
|        | <i>Ets1</i>                                                            | 96                                              |
|        | <i>Fli1</i>                                                            | 96                                              |
|        | <i>Etv2</i>                                                            | 96                                              |
|        |                                                                        |                                                 |
| Gata1  | <u><i>Gfi1b</i></u>                                                    | 86                                              |
|        | <i>Gfi1</i>                                                            | 87                                              |
| HoxB4  | <u><i>Lyl1</i></u>                                                     | 74                                              |
|        | <i>Erg</i>                                                             | 74                                              |
| Sox17  | <b><i>Lyl1</i> <math>\wedge</math> <math>\neg</math> <i>Gfi1b</i></b>  | 75                                              |
| Ets1   | <i>Sox7</i>                                                            | 99                                              |
|        | <b><i>Notch1</i></b>                                                   | 94                                              |
| Gfi1   | <i>Gata1</i>                                                           | 87                                              |
|        | <b><i>Gata1</i> <math>\wedge</math> <math>\neg</math> <i>Sox17</i></b> | 87                                              |
|        | <b><i>Nfe2</i> <math>\wedge</math> <math>\neg</math> <i>Sox17</i></b>  | 87                                              |
|        | <i>HoxB4</i> $\wedge$ $\neg$ <i>Notch1</i>                             | 87                                              |
|        | <i>Gfi1b</i> $\wedge$ $\neg$ <i>Sox17</i>                              | 86                                              |
|        |                                                                        |                                                 |
| Gfi1b  | <i>Gata1</i>                                                           | 86                                              |
|        | <u><i>Nfe2</i></u>                                                     | 82                                              |
|        | <i>Gfi1</i>                                                            | 81                                              |
| Eto2   | <u><i>Fli1</i></u>                                                     | 97                                              |
|        | <i>Tal1</i>                                                            | 96                                              |
|        | <u><i>Ets1</i></u>                                                     | 96                                              |
|        | <b><i>Sox7</i></b>                                                     | 94                                              |
|        | <b><i>Hhex</i></b>                                                     | 94                                              |
|        | <i>Etv2</i>                                                            | 94                                              |
| Hhex   | <i>Scl</i>                                                             | 99                                              |
|        | <i>Fli1</i>                                                            | 99                                              |
|        | <i>Ets1</i>                                                            | 99                                              |

Continued on next page



continued from previous page

| Gene   | Synthesised update functions | % Non-observed transitions disallowed ( $N_i$ ) |
|--------|------------------------------|-------------------------------------------------|
|        | <b>Sox7</b>                  | 98                                              |
|        | <i>Etv2</i>                  | 97                                              |
| Ikaros | <b>Nfe2</b> ∨ <b>Gfi1b</b>   | 83                                              |
|        | <i>Gata1</i> ∨ <i>Gfi1b</i>  | 80                                              |
|        | <i>Myb</i> ∨ <i>Gfi1b</i>    | 80                                              |
|        | <i>Gfi1</i> ∨ <i>Gfi1b</i>   | 80                                              |
|        | <i>Myb</i> ∧ <i>Eto2</i>     | 80                                              |
|        | <i>Myb</i> ∨ <i>Lyl1</i>     | 81                                              |
| Lmo2   | <u><i>Sox7</i></u>           | 72                                              |
| Nfe2   | <i>Gata1</i>                 | 84                                              |
|        | <i>Gfi1b</i>                 | 84                                              |
|        | <i>Gfi1</i>                  | 80                                              |
|        | <b>lkaros</b>                | 73                                              |
| Pu.1   | <i>lkaros</i>                | 75                                              |
|        | <i>Gfi1b</i>                 | 74                                              |
| Myb    | <i>lkaros</i>                | 79                                              |
|        | <i>Gfi1b</i>                 | 75                                              |

**Supplementary Table 6:** Statistical analysis of *Erg+85* enhancer assays. Results of statistical analysis for Figure 4B, comparing each construct to wild type on each day. P values were generated for each differentiation with t-tests, and differentiations were combined by the Fisher's method to calculate overall significance. Where replicates differed in whether the percentage of YFP+ cells was higher or lower than wild type, Stouffer's Z trend was used rather than Fisher's method. \*, p <0.05; \*\*, p<0.01; \*\*\*, p<0.001; ns, not significant (p >0.05).

| Population | Mutant | Day3 | Day4 | Day5 | Day6 | Day7 |
|------------|--------|------|------|------|------|------|
| Flk1+CD41- | Hox    | *    | ns   | ns   | ns   | ns   |
|            | Sox    | ns   | ns   | ns   | ns   | ns   |
|            | HoxSox | ns   | *    | *    | *    | ns   |
| Flk1+CD41+ | Hox    | ns   | **   | ns   | **   | *    |
|            | Sox    | *    | ns   | ns   | ns   | ns   |
|            | HoxSox | ns   | *    | *    | **   | *    |
| Flk1-CD41+ | Hox    | ns   | ***  | **   | ns   | ns   |
|            | Sox    | ns   | ns   | ns   | ns   | ns   |
|            | HoxSox | ns   | **   | *    | ns   | ns   |

## Supplementary Note: Reconstructing an existing Boolean network

To assess the ability of the synthesis method to reconstruct existing asynchronous Boolean networks from their state spaces, we applied the method to a Boolean network model of the core regulatory network active in common myeloid progenitor cells<sup>9</sup>. We took the existing Boolean network, constructed its associated state space (shown in the figure below), and then used this state space as input to our synthesis method in order to try to reconstruct the Boolean network that we started with.

**Table 1:** Original Boolean rules.

| Gene   | Update function                                    |
|--------|----------------------------------------------------|
| Gata2  | $Gata2 \wedge \neg(Pu.1 \vee (Gata1 \wedge Fog1))$ |
| Gata1  | $(Gata1 \vee Gata2 \vee Fli1) \wedge \neg Pu.1$    |
| Fog1   | $Gata1$                                            |
| EKLF   | $Gata1 \wedge \neg Fli1$                           |
| Fli1   | $Gata1 \wedge \neg EKLF$                           |
| Scf    | $Gata1 \wedge \neg Pu.1$                           |
| Cebpa  | $Cebpa \wedge \neg(Scf \vee (Fog1 \wedge Gata1))$  |
| Pu.1   | $(Cebpa \vee Pu.1) \wedge \neg(Gata1 \vee Gata2)$  |
| cJun   | $Pu.1 \wedge \neg Gfi1$                            |
| EgrNab | $(Pu.1 \wedge cJun) \wedge \neg Gfi1$              |
| Gfi1   | $Cebpa \wedge \neg EgrNab$                         |

**Figure 1:** Network state space

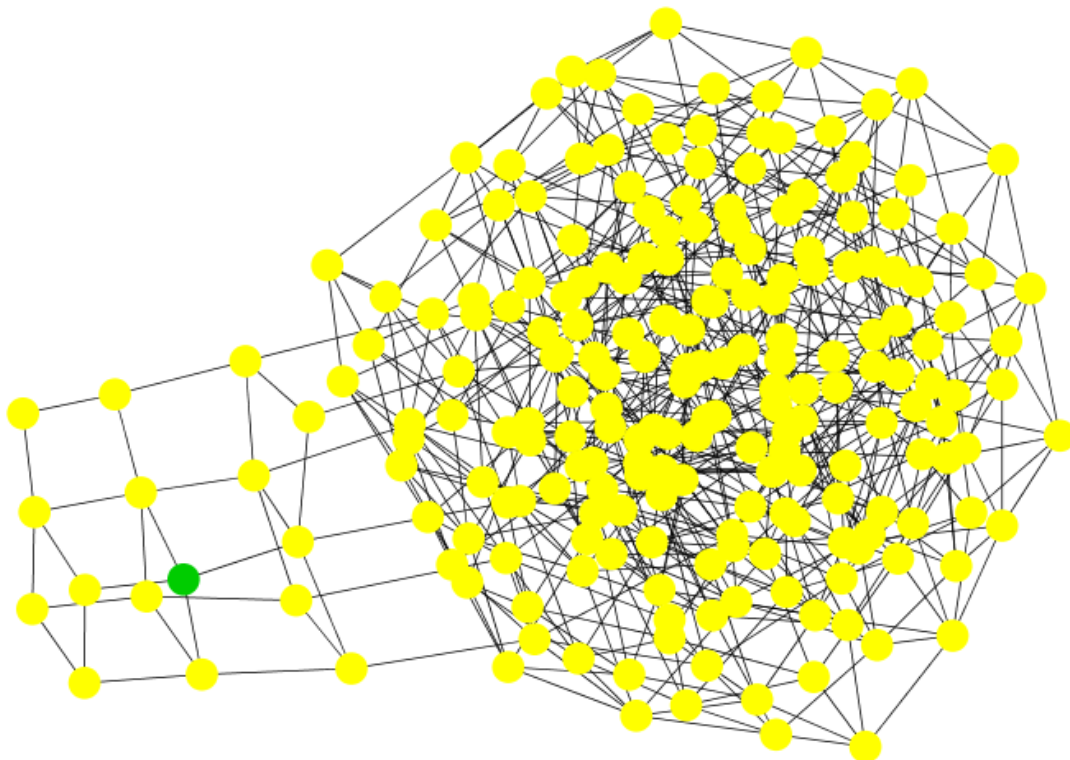

The results of applying our synthesis method are shown in the table below. The method successfully reconstructs the Boolean update function for all but one gene (*EgrNab*), in some cases uniquely identifying the correct function. We note that when multiple solutions are found for an update function, these solutions, while not exact, all provide useful regulatory information that could be verified in an experimental scenario. For example, both solutions for *Scf* successfully predict *Scf*'s activation by *Gata1*, although one of the two solutions omits its repression by *Pu.1*. We found that these results were robust when performing bootstrapping, randomly discarding 10% of the state space data and rerunning the analysis.

**Table 2: Synthesised Boolean functions**

| Gene   | Synthesised update functions                                                                                                                                                                                                                                                                                                                                                                                                                                                                                                                                                                                                                                                                                    | Comments  |
|--------|-----------------------------------------------------------------------------------------------------------------------------------------------------------------------------------------------------------------------------------------------------------------------------------------------------------------------------------------------------------------------------------------------------------------------------------------------------------------------------------------------------------------------------------------------------------------------------------------------------------------------------------------------------------------------------------------------------------------|-----------|
| Gata2  | $Gata2 \wedge \neg(Fog1 \vee Pu.1)$<br>$Gata2 \wedge \neg(Fog1 \vee (Pu.1 \wedge Cebpa))$<br>$Gata2 \wedge \neg(Fog1 \vee (Pu.1 \wedge Gata2))$<br>$Gata2 \wedge \neg(Gata2 \wedge (Pu.1 \vee Fog1))$<br><b><math>Gata2 \wedge \neg(Pu.1 \vee (Gata1 \wedge Fog1))</math></b><br>$Gata2 \wedge \neg(Pu.1 \vee (Gata2 \wedge Fog1))$                                                                                                                                                                                                                                                                                                                                                                             |           |
| Gata1  | $(Gata1 \vee Cebpa) \wedge \neg Pu.1$<br>$(Gata2 \vee Fog1) \wedge \neg Pu.1$<br>$(Gata1 \vee Gata2) \wedge \neg Pu.1$<br><b><math>(Gata1 \vee Gata2 \vee Fli1) \wedge \neg Pu.1</math></b><br>Other functions of the form $(X \vee Y \vee Z) \wedge \neg Pu.1$                                                                                                                                                                                                                                                                                                                                                                                                                                                 |           |
| Fog1   | <b>Gata1</b>                                                                                                                                                                                                                                                                                                                                                                                                                                                                                                                                                                                                                                                                                                    | Unique    |
| EKLF   | <b>Gata1 <math>\wedge</math> <math>\neg</math> Fli1</b>                                                                                                                                                                                                                                                                                                                                                                                                                                                                                                                                                                                                                                                         | Unique    |
| Fli1   | <b>Gata1 <math>\wedge</math> <math>\neg</math> EKLF</b>                                                                                                                                                                                                                                                                                                                                                                                                                                                                                                                                                                                                                                                         | Unique    |
| Scf    | $Gata1$<br><b><math>Gata1 \wedge \neg Pu.1</math></b>                                                                                                                                                                                                                                                                                                                                                                                                                                                                                                                                                                                                                                                           |           |
| Cebpa  | $Cebpa \wedge \neg(Fog1 \vee Scf)$<br>$Cebpa \wedge \neg(Cebpa \wedge (Scf \vee Fog1))$<br>$Cebpa \wedge \neg(Fog1 \wedge (Scf \vee Cebpa))$<br>$Cebpa \wedge \neg(Fog1 \vee (Scf \wedge Gata1))$<br>$Cebpa \wedge \neg(Fog1 \vee (Scf \wedge Gata2))$<br>$Cebpa \wedge \neg(Gata1 \wedge (Fog1 \vee Scf))$<br>$Cebpa \wedge \neg(Scf \vee (Fog1 \wedge Cebpa))$<br><b><math>Cebpa \wedge \neg(Scf \vee (Fog1 \wedge Gata1))</math></b>                                                                                                                                                                                                                                                                         |           |
| Pu.1   | $Pu.1 \wedge \neg Gata2$<br>$(Pu.1 \wedge Cebpa) \wedge \neg Gata2$<br>$Pu.1 \wedge \neg(Gata1 \vee Gata2)$<br>Other functions of the form $Pu.1 \wedge \neg(Gata2 \vee X)$<br>$Pu.1 \wedge \neg(Gata2 \wedge Cebpa)$<br>$Pu.1 \wedge \neg(Gata2 \wedge Pu.1)$<br>$Cebpa \wedge \neg(Gata1 \vee Gata2)$<br>$Cebpa \wedge \neg(Gata2 \vee Fog1)$<br><b><math>(Cebpa \vee Pu.1) \wedge \neg(Gata1 \vee Gata2)</math></b><br>$(Cebpa \wedge Pu.1) \wedge \neg(Gata1 \vee Gata2)$<br>Other functions of the form $(Cebpa \vee X) \wedge \neg(Gata2 \vee Y)$<br>Other functions of the form $(Pu.1 \vee X) \wedge \neg(Gata2 \vee Y)$<br>Other functions of the form $(Cebpa \wedge Pu.1) \wedge \neg(Gata2 \vee X)$ |           |
| cJun   | <b><math>Pu.1 \wedge \neg Gfi1</math></b>                                                                                                                                                                                                                                                                                                                                                                                                                                                                                                                                                                                                                                                                       | Unique    |
| EgrNab | $(cJun \vee Gata1) \wedge \neg Gfi1$                                                                                                                                                                                                                                                                                                                                                                                                                                                                                                                                                                                                                                                                            | Incorrect |
| Gfi1   | <b><math>Cebpa \wedge \neg EgrNab</math></b>                                                                                                                                                                                                                                                                                                                                                                                                                                                                                                                                                                                                                                                                    | Unique    |

## REFERENCES

1. Sacilotto, N. *et al.* Analysis of Dll4 regulation reveals a combinatorial role for Sox and Notch in arterial development. *Proc. Natl. Acad. Sci. U. S. A.* **110**, 11893–8 (2013).
2. Sánchez-Castillo, M. *et al.* CODEX: a next-generation sequencing experiment database for the haematopoietic and embryonic stem cell communities. *Nucleic Acids Res.* (2014). doi:10.1093/nar/gku895
3. Chapman, M. A. *et al.* Analysis of multiple genomic sequence alignments: a web resource, online tools, and lessons learned from analysis of mammalian SCL loci. *Genome Res.* **14**, 313–8 (2004).
4. Göttgens, B. *et al.* Analysis of vertebrate SCL loci identifies conserved enhancers. *Nat. Biotechnol.* **18**, 181–186 (2000).
5. Fan, R. *et al.* Dynamic HoxB4-regulatory network during embryonic stem cell differentiation to hematopoietic cells. *Blood* **119**, e139–47 (2012).
6. Warren, A. J. *et al.* The Oncogenic Cysteine-rich LIM domain protein Rbtn2 is essential for erythroid development. *Cell* **78**, 45–57 (1994).
7. Hart, A. *et al.* Fli-1 is required for murine vascular and megakaryocytic development and is hemizygotously deleted in patients with thrombocytopenia. *Immunity* **13**, 167–77 (2000).
8. Spyropoulos, D. D. *et al.* Hemorrhage, impaired hematopoiesis, and lethality in mouse embryos carrying a targeted disruption of the Fli1 transcription factor. *Mol. Cell. Biol.* **20**, 5643–52 (2000).
9. Krumsiek, J., Marr, C., Schroeder, T. & Theis, F. J. Hierarchical differentiation of myeloid progenitors is encoded in the transcription factor network. *PLoS One* **6**, e22649 (2011).
